1  
2  
3  
4  
5  
6  
7  
8  
9  
10  
11  
12  
13  
14  
15  
16  
17  
18  
19  
20  
21  
22  
23  
24  
25  
26  
27  
28  
29  
30  
31  
32  
33  
34  
35  
36  
37  
38  
39  
40  
41  
42  
43  
44  
45

## Developmental cell death of cortical projection neurons is controlled by a Bcl11a/Bcl6-dependent pathway

Wiegreffe C.<sup>1</sup>, Wahl T.<sup>1</sup>, Joos N., S.<sup>1,2</sup>, Bonnefont J.<sup>3,4</sup>, Vanderhaeghen P.<sup>3,4</sup>, Liu P.<sup>5</sup>, and Britsch, S.<sup>1,\*</sup>

<sup>1</sup> Institute of Molecular and Cellular Anatomy, Ulm University, 89081 Ulm, Germany

<sup>2</sup> present address: Department of Internal Medicine I, University Hospital Ulm, 89081 Ulm, Germany

<sup>3</sup> Université Libre de Bruxelles (ULB), Institut de Recherches en Biologie Humaine et Moléculaire (IRIBHM), and ULB Neuroscience Institute (UNI), 1070 Brussels, Belgium

<sup>4</sup> VIB-KU Leuven Center for Brain & Disease Research, KU Leuven Department of Neuroscience, Leuven Brain Institute, 3000 Leuven, Belgium

<sup>5</sup> School of Biomedical Sciences, Li Ka Shing Faculty of Medicine, The University of Hong Kong, Hong Kong, China.

**\*Corresponding author:** Prof. Dr. Stefan Britsch  
Institute of Molecular and Cellular Anatomy, Ulm University  
Albert-Einstein-Allee 11, 89081 Ulm, Germany  
Phone +49 (0) 731 500-23101  
Fax +49 (0) 731 500-23102  
Email [stefan.britsch@uni-ulm.de](mailto:stefan.britsch@uni-ulm.de)

**Running title:** *Bcl6 controls developmental neuron death*

**Key words:** neocortex, developmental cell death, transcription factor, Bcl11a, Bcl6

**Manuscript length:** 28 pages  
5 figures  
abstract: 156 words  
main text: 27,827 characters without spaces

**Supplementary information:** 5 supplementary figures S1-S5  
2 supplementary tables S1-S2

1 **Abstract**

2

3 Developmental neuron death plays a pivotal role in refining organization and wiring during  
4 neocortex formation. Aberrant regulation of this process results in neurodevelopmental  
5 disorders including impaired learning and memory. Underlying molecular pathways are  
6 incompletely determined. Loss of *Bcl11a* in cortical projection neurons induces pronounced  
7 cell death in upper-layer cortical projection neurons during postnatal corticogenesis. We used  
8 this genetic model to explore genetic mechanisms by which developmental neuron death is  
9 controlled. Unexpectedly, we found *Bcl6*, previously shown to be involved in transition of  
10 cortical neurons from progenitor to postmitotic differentiation state to provide a major check  
11 point regulating neuron survival during late cortical development. We show that *Bcl11a* is a  
12 direct transcriptional regulator of *Bcl6*. Deletion of *Bcl6* exerts death of cortical projection  
13 neurons. In turn, reintroduction of *Bcl6* into *Bcl11a* mutants prevents induction of cell death in  
14 these neurons. Together, our data identify a novel *Bcl11a/Bcl6*-dependent molecular pathway  
15 in regulation of developmental cell death during corticogenesis.

16

17

18

19

20

## 1 **Introduction**

2

3 Developmental cell death (DCD) occurs in all animals and organs. It is part of a homeostatic

4 balance between generation and elimination of cells. DCD provides a major check point for

5 quality control allowing selective removal of either defective, mis-integrated or no longer

6 required cells (Causeret et al., 2018; Wong and Marin, 2019). During development of the

7 mammalian neocortex excess numbers of neurons are generated. Supernumerary neurons are

8 eliminated during two distinct waves of apoptosis. In mice, a first wave of DCD occurs around

9 E14 and affects predominantly proliferating neuron precursors (Blaschke et al., 1996; de la

10 Rosa and de Pablo, 2000; Roth et al., 2000). During a second wave, corresponding to the first

11 two postnatal weeks in rodents, approximately 30% of postmitotic cortical neurons are

12 eliminated by DCD (Southwell et al., 2012; Verney et al., 2000). Within this period, entire

13 neuron populations, as for example Cajal-Retzius cells, which transiently serve as signaling

14 centers, are removed by DCD (Chowdhury et al., 2010; Ledonne et al., 2016), while in other

15 neuron types, like cortical projection neurons (CPN), DCD adjusts definitive neuron numbers

16 and refines immature synaptic circuits (Blanquie et al., 2017; Wong et al., 2018). In the

17 neocortex dysregulated DCD has been shown to be associated with a wide spectrum of

18 neurodevelopmental disorders, including major structural changes as well as structurally more

19 subtle defects, like autism-spectrum disorders and intellectual disability (Eriksson et al., 2001;

20 Kuida et al., 1996; Nakamura et al., 2016; Wei et al., 2014). DCD acts cell-type specific and is

21 spatio-temporally highly restricted suggesting complex molecular regulation. In contrast to the

22 peripheral nervous system, where target-derived neurotrophic signals have been extensively

23 demonstrated to play a key role in regulation of neuron survival (Huang and Reichardt, 2001),

24 the molecular controls of DCD within the central nervous system (CNS) are incompletely

25 determined. Electrical and synaptic activity have been shown to confer survival signals onto

26 postmitotic cortical neurons (Blanquie et al., 2017; Denaxa et al., 2018; Priya et al., 2018; Wong

1 et al., 2018). Transcription factor cascades as well as secreted signaling molecules are of key  
2 importance for the development of the neocortex. It is, however, unclear, how these regulatory  
3 networks are connected to DCD.

4 *Bcl11a* (*Ctip1*) encodes a zinc-finger protein that regulates transcription through interaction  
5 with COUP-TF proteins as well as direct, sequence-dependent DNA binding (Avram et al.,  
6 2002). We recently demonstrated that postmitotic upper-layer CPN require expression of  
7 *Bcl11a* for early postnatal survival. Cre/loxP dependent ablation of *Bcl11a* in CPN results in  
8 massive increase of apoptosis between P4 and P6 selectively in upper-layer CPN (Wiegrefe et  
9 al., 2015).

10 In this study we employed *Bcl11a* mutation in CPN as highly selective genetic tool to  
11 systematically identify downstream-candidate genes involved in the regulation of DCD in  
12 postmitotic CPN. Using comparative transcriptome analyses we found that *Bcl6*, previously  
13 reported to be involved in transition of cortical neurons from progenitor to postmitotic  
14 differentiation state (Bonfont et al., 2019; Tiberi et al., 2012), is downregulated in *Bcl11a*  
15 mutant upper-layer CPN. Furthermore, we show *Bcl11a* to directly bind to a conserved  
16 promoter element of the *Bcl6* gene. Knock-out of *Bcl6* in postmitotic CPN induces their  
17 apoptosis. In turn, reintroduction of *Bcl6* into *Bcl11a* mutant CPN prevents these neurons from  
18 apoptosis. Finally, we show *Foxo1* to be downregulated in *Bcl6* mutant CPN. The Foxo  
19 transcription factor family is well established for their ability to regulate apoptosis in neurons  
20 (Santo and Paik, 2018) suggesting *Bcl6* to regulate DCD at least in part through Foxo1 function.  
21 Taken together, in this study we demonstrate that DCD of postmitotic upper-layer CPN is  
22 controlled by a novel *Bcl11a*/*Bcl6*-dependent transcriptional pathway.

23

24

25

## 1 **Results**

2

### 3 **Identification of downstream candidate targets of Bcl11a**

4 We used *Bcl11a*<sup>F/F</sup>; *Emx1*<sup>IRESCre</sup> brains as a model to identify genes that play a role in postnatal  
5 survival of projection neurons in the somatosensory neocortex. *Bcl11a* mutant brains display  
6 robust increase of apoptosis during the second wave of DCD in upper cortical layers at postnatal  
7 stages (Wiegrefe et al., 2015). Using laser capture microdissection we specifically isolated  
8 cortical layers 2-4 of *Bcl11a* mutant and control brains at P2 (Fig. 1A, B), a stage when the  
9 second wave of apoptosis has not yet been initiated (Blanquie et al., 2017) and cell death is not  
10 yet increased in *Bcl11a* mutants (Wiegrefe et al., 2015). We then performed a differential  
11 expression analysis using microarrays and identified a set of 137 differentially expressed (DE)  
12 genes that were subjected to a GO overrepresentation test, which revealed genes involved in  
13 axon guidance, cell-cell adhesion, and regulation of cell communication (Fig. 1C; Fig. S1; Fig.  
14 S2A; Tab. S1). To verify the validity of the experimental approach, selected candidate genes  
15 were tested by quantitative real-time PCR and RNA *in situ* hybridization. *Cdh6*, *Cdh12*, *Efna5*,  
16 and *Pcdh9* that were identified as downregulated were verified by this approach (Fig. S2B, C).  
17 In addition, *Cdh13*, *Flrt2*, *Flrt3*, and *Slit2* were verified as upregulated (Fig. S2B, D). Together,  
18 these results show that our genetic approach consistently identified DE genes in upper cortical  
19 layers of *Bcl11a* mutant brains that could directly or indirectly be involved in the regulation of  
20 developmental apoptosis.

21 Among the DE genes we found *Bcl6*, a transcriptional repressor that was previously reported  
22 to regulate cortical neurogenesis (Bonfont et al., 2019; Tiberi et al., 2012), to be  
23 downregulated by  $64.8\% \pm 0.1\%$  in *Bcl11a* mutant neocortex (Fig. 1D). Using RNA *in situ*  
24 hybridization we found robust expression of *Bcl6* predominantly in upper and at low levels in  
25 deep cortical layers of controls between E17.5 and P4 (Fig. 1E). In *Bcl11a* mutant neocortex  
26 *Bcl6* was downregulated in upper cortical layers at these stages (Fig. 1E) suggesting this gene

1 to be transcriptionally downstream of *Bcl11a* in upper cortical layers. Outside the CNS, *Bcl6*  
2 exerts anti-apoptotic functions by suppressing genes involved in DNA damage response (Phan  
3 and Dalla-Favera, 2004; Phan et al., 2005; Ranuncolo et al., 2007), which could possibly be  
4 conserved in the developing neocortex as well. Therefore, we focused further analyses on *Bcl6*.

### 6 ***Bcl6* is a direct target of *Bcl11a* in upper-layer cortical projection neurons**

7 To better characterize the expression of *Bcl6* protein in early postnatal somatosensory cortex  
8 we generated a polyclonal antibody in guinea pig raised against the N-terminal 484 amino acids  
9 of mouse *Bcl6*. Specificity of the *Bcl6* antibody was tested by immunohistochemistry using  
10 *Bcl6* mutant brains, which lack exons 4-10 (Ye et al., 1997) and do not express *Bcl6* protein  
11 (Tiberi et al., 2012). In comparison to wildtype littermates, we did not detect *Bcl6* protein in  
12 *Bcl6* mutant brains at P0 (Fig. S3), demonstrating our antibody to specifically detect *Bcl6*  
13 protein. Coexpression analysis of *Bcl6* together with *Bcl11a* and *Satb2*, a marker for callosal  
14 projection neurons (Alcamo et al., 2008; Britanova et al., 2008), showed  $25.6 \pm 1.9\%$  *Bcl6*<sup>+</sup>  
15 *Bcl11a*<sup>+</sup> *Satb2*<sup>+</sup>,  $1.3 \pm 0.5\%$  *Bcl6*<sup>+</sup> *Bcl11a*<sup>+</sup>, and  $0.8 \pm 0.2\%$  *Bcl6*<sup>+</sup> *Satb2*<sup>+</sup> cells in wild-type  
16 brains. Only  $0.3 \pm 1.0\%$  of cells exclusively expressed *Bcl6* (Fig. 2A, B). Coexpression analysis  
17 of *Bcl6* together with *Bcl11a* and *Cux1*, a marker for cortical layers 2-4 (Nieto et al., 2004),  
18 showed  $19.0 \pm 0.7\%$  *Bcl6*<sup>+</sup> *Bcl11a*<sup>+</sup> *Cux1*<sup>+</sup>,  $11.6 \pm 0.9\%$  *Bcl6*<sup>+</sup> *Bcl11a*<sup>+</sup>, and  $1.0 \pm 0.2\%$  *Bcl6*<sup>+</sup>  
19 *Cux1*<sup>+</sup> cells. Again, only  $0.9 \pm 0.2\%$  of cells exclusively expressed *Bcl6* (Fig. 2C, D). Thus,  
20 more than 90% of *Bcl6*<sup>+</sup> cells coexpress *Satb2* as well as *Bcl11a* and more than 61% of these  
21 cells are located in *Cux1*<sup>+</sup> upper layers with distinct localization to cortical layers 2/3 (Fig. 2C).  
22 Notably, a substantial proportion of *Bcl6*<sup>+</sup> cells is located in deep cortical layers. Thus, *Bcl6* is  
23 a marker for a subset of callosal projection neurons identified by coexpression of *Bcl11a* and  
24 that are located in cortical layers 2/3 as well as in deep cortical layers.

25 By DNA sequence analysis we found a TGACCA binding motif of *Bcl11a* (Liu et al., 2018) in  
26 the first intron that was located 982 bp downstream of the transcriptional start site and ~10.2

1 kb upstream of the first protein coding exon of the *Bcl6* gene. This binding motif was embedded  
2 within a 55 bp long conserved region with a high degree of conservation between rat, human,  
3 and chimp (Fig. 2E). Binding of Bcl11a to this motif was tested by chromatin  
4 immunoprecipitation (ChIP) followed by quantitative real-time PCR using a primer pair  
5 flanking this region. An enrichment of more than 4-fold was found using a Bcl11a specific  
6 antibody in comparison to an immunoglobulin G (IgG) control antibody (Fig. 2F),  
7 demonstrating binding of Bcl11a to this region. As a negative control, binding of Bcl11a to  
8 exon 5 of *Bcl6* was tested, but no significant enrichment was found in comparison to the IgG  
9 control antibody (Fig. 2F).

10

### 11 **Bcl6 is downregulated in upper layers of Bcl11a mutant neocortex**

12 To confirm Bcl6 downregulation in the *Bcl11a* mutant neocortex on protein level, we  
13 performed immunohistochemistry with Bcl6 and neuron subtype specific antibodies. The  
14 overall expression of Bcl6 was reduced by  $44.0\% \pm 7.0\%$  compared to control neocortex at P2  
15 (Fig. 3A, B). We did not detect changes in the number of Satb2<sup>+</sup> and Cux1<sup>+</sup> cells that would  
16 normally coexpress with Bcl6 (c.f. Fig 2), suggesting that these cells are born correctly, have  
17 for the most part migrated to their respective layers, and undergo neuron subtype specific  
18 differentiation (Fig. 3A, B). Furthermore, the proportion of Cux1<sup>+</sup> and Satb2<sup>+</sup> cells coexpressing  
19 Bcl6 was reduced from  $57.4 \pm 2.3\%$  to  $24.2 \pm 2.6\%$  and  $58.5 \pm 2.8\%$  to  $31.8 \pm 1.6\%$ ,  
20 respectively, in *Bcl11a* mutant compared to control neocortex (Fig. 3A, C). As previously  
21 demonstrated, cortical thickness is reduced and layer 5 is increased at the expense of layer 6 in  
22 *Bcl11a* mutants at this stage (Wiegreffe et al., 2015; Woodworth et al., 2016). We did not detect  
23 significant changes in the number of cells coexpressing Bcl6 in deep cortical layers labelled by  
24 Bcl11b (layer 5) or Tbr1 (layer 6) (Molyneaux et al., 2007); Fig. S4) indicating a selective loss  
25 of Bcl6 in upper-layer neurons. Together, these data are compatible with a function of Bcl6 in

1 neuron survival, which is massively impaired in upper layers of the *Bcl11a* mutant neocortex  
2 after P2 (Wiegreffe et al., 2015).

3

#### 4 **Cell-autonomous control of Bcl6 expression by *Bcl11a***

5 To further examine whether Bcl6 expression is directly regulated by Bcl11a in neurons, we  
6 created a mosaic mutant *in vivo* situation by using *in utero* electroporation. We generated  
7 *Bcl11a* deficient neurons in cortical layer 2/3 by electroporating Cre together with GFP (*CAG-*  
8 *Cre<sup>GFP</sup>*) or GFP alone (*CAG-Ctl<sup>GFP</sup>*) into conditional *Bcl11a* mutant (*Bcl11a<sup>F/F</sup>*) brains at E15.5  
9 and analyzed the transfected brains at P2 (Fig. 4A, B). The proportion of GFP<sup>+</sup> cells that  
10 coexpresses Bcl6 was reduced from 70.3% ± 4.0% in controls to 9.5% ± 1.5% in *Bcl11a*  
11 deficient cortical neurons (Fig. 4C, F). In contrast, the proportions of GFP<sup>+</sup> cells that coexpress  
12 Cux1 or Satb2 remained unchanged (Fig. 4D-F). Thus, cell autonomous loss of *Bcl11a* in  
13 superficial cortical layers leads to a dramatic and specific reduction of Bcl6 and, together with  
14 the direct binding of Bcl11a to a conserved motif in the first intron of the *Bcl6* gene (Fig. 2E,  
15 F), suggests that Bcl11a directly controls *Bcl6* expression in these cells.

16

#### 17 **Reintroduction of *Bcl6* into *Bcl11a* mutants rescues neuron death**

18 We next asked, whether reintroduction of *Bcl6* into *Bcl11a* mutant neurons located in upper  
19 cortical layers could rescue mutant neurons from undergoing apoptosis and thereby normalize  
20 the *Bcl11a* mutant phenotype. We generated Cre-dependent control (*CAG-LSL-Ctl<sup>GFP</sup>*) and  
21 *Bcl6* (*CAG-LSL-Bcl6<sup>GFP</sup>*) expression constructs that were tested in HEK293 cells and by  
22 Western blot (Fig. 4G, S5A). Both constructs induced robust *GFP* expression in the presence  
23 or absence of *Cre*, indicating that the floxed stop (*LSL*) cassette did not prevent the *GFP* from  
24 being expressed. However, *Bcl6* expression was only observed in the presence of *Cre*,  
25 indicating a tight regulation of *Bcl6* expression from this construct (Fig. S5B). We then  
26 overexpressed *Bcl6* in *Bcl11a* mutant cortical neurons by *in utero* electroporation at E15.5 and



1 sacrificed the brains at P5 (Fig. 4A). To circumvent functions of *Bcl6* that could interfere with  
2 neurogenesis (Bonfont et al., 2019; Tiberi et al., 2012), we directed *Bcl6* expression to  
3 postmitotic neurons by electroporating *CAG-LSL-Ctl<sup>GFP</sup>* or *CAG-LSL-Bcl6<sup>GFP</sup>* expression  
4 constructs together with *Cre* placed under the control of the postmitotically activated *Neurod*  
5 promoter (*Neurod-Cre*) into *Bcl11a<sup>ΔF</sup>* (i.e. conditional mutant) or *Bcl11a<sup>+F</sup>* (i.e. control) brains  
6 (Fig. 4G). Co-electroporation of *Neurod-Cre* together with *CAG-LSL-Ctl<sup>GFP</sup>* robustly induced  
7 cell death in *Bcl11a<sup>ΔF</sup>* in comparison to control brains by more than 3-fold. In contrast,  
8 postmitotic reintroduction of *Bcl6* into *Bcl11a* deficient neurons reduced apoptosis to control  
9 levels. Of note, overexpression of *Bcl6* in control brains did not significantly reduce the number  
10 of cleaved caspase 3<sup>+</sup> cells below control levels (Fig. 4H, I). Together, these data strongly  
11 support a role for *Bcl6* as a direct functional downstream target of *Bcl11a* that plays an  
12 important role for neuron survival during the second wave of developmental cell death at the  
13 early postnatal stage.

14

### 15 **Increased cell death in postnatal *Bcl6* mutant neocortex**

16 To further corroborate that *Bcl6* confers survival of cortical projection neurons, we generated  
17 forebrain-specific *Bcl6* mutants by crossing conditional *Bcl6* mutant mice (*Bcl6<sup>F/F</sup>*), in which  
18 exons 7-9 are flanked by *loxP* sites (Hollister et al., 2013), with *Nex<sup>Cre</sup>* mice (Goebbels et al.,  
19 2006) that induce recombination in postmitotic cortical projection neurons. Quantitative real-  
20 time PCR showed that *Nex<sup>Cre</sup>* reduced *Bcl6* expression by 80.0% ± 0.1% compared to controls  
21 at P0 (Fig. 5B). Due to restricted activity of *Nex<sup>Cre</sup>* incomplete reduction of *Bcl6* is most likely  
22 caused by residual expression in non-neuronal cell types. We chose P5 to analyze  
23 developmental cell death in *Bcl6* mutant brains because *Bcl11a* mutants display massively  
24 increased cell death (Wiegrefe et al., 2015) and naturally occurring cell death in wildtype  
25 brains peaks around this stage (Blanquie et al., 2017). We found a significant increase of  
26 cleaved caspase 3<sup>+</sup> cells located predominantly in the upper cortical layers from 6.04% ± 0.02%

1 in controls to  $8.44\% \pm 0.77\%$  cells/mm<sup>2</sup> in *Bcl6* mutant brains concomitant with a reduction of  
2 cortical area by  $9.7\% \pm 2.0\%$  (Fig. 5A, C, D). Collectively, these data show that Bcl6 exerts  
3 functions in upper-layer neuron survival during early postnatal neocortical development. To  
4 characterize downstream genetic pathways of Bcl6 responsible for the observed phenotype, we  
5 isolated upper cortical layers from *Bcl6* mutant and control brains by laser capture  
6 microdissection at P5 and performed a differential expression analysis on this tissue using  
7 microarrays. This analysis revealed a small number of DE genes that were mostly upregulated  
8 in *Bcl6* mutant upper cortical layers (Fig. 5E). Of these genes, the cell death associated factor  
9 Foxo1, previously demonstrated to be involved in regulation of neuron death (Carter and  
10 Brunet, 2007; Santo and Paik, 2018) was found upregulated in *Bcl6* as well as in *Bcl11a*  
11 mutants. Differential expression was verified by quantitative real-time PCR and RNA *in situ*  
12 hybridization. *Foxo1* expression was upregulated more than 2-fold (Fig. 5F) and upregulation  
13 was most apparent in upper layers of the *Bcl6* mutant neocortex compatible with an induction  
14 of cell death at this stage. In lymphoid cells Bcl6 regulates cell death through p53 function  
15 (Cerchietti et al., 2008; Phan and Dalla-Favera, 2004). We did not detect changes in p53  
16 expression in our expression analysis.

17 Together, our data uncover *Bcl6* as a direct functional downstream target of Bcl11a that plays  
18 an important role in regulation of DCD of upper-layer CPN at early postnatal stages.

19

## 1 **Discussion**

2

3 Selective deletion of the zinc finger transcription factor *Bcl11a* in CPN results in massively  
4 increased developmental neuron death during early postnatal development of the murine  
5 neocortex (Wiegrefte et al., 2015). In the present study we used this genetic model as a tool to  
6 detect candidate regulatory mechanisms in control of DCD during cortical development. We  
7 identified *Bcl6* as a direct downstream transcriptional target of *Bcl11a*. *Bcl6* is downregulated  
8 in *Bcl11a* mutant upper-layer CPN. Reintroduction of *Bcl6* into *Bcl11a* mutant upper-layer  
9 CPN completely rescues the apoptosis phenotype, while conditional deletion of *Bcl6* in CPN  
10 induces neuron death. Finally, our data suggest *Bcl6* to exert part of its survival functions  
11 through *Foxo1*. Together, in the present study we uncover a novel, neuron-type and  
12 developmental-phase specific *Bcl11a/Bcl6*-dependent transcriptional pathway in the control of  
13 developmental neuron death in murine neocortico-genesis.

14

15 During neocortico-genesis DCD occurs in two spatiotemporally defined waves. In mice,  
16 numbers of CPN have been shown to be refined by DCD between P4 and P6 (Blanquie et al.,  
17 2017; Verney et al., 2000; Wong et al., 2018). This time course precisely corresponds to  
18 elevated apoptosis of upper-layer CPN observed in *Bcl11a* mutants (Wiegrefte et al., 2015),  
19 demonstrating our genetic approach to be phase- and cell-type specific. Comparative  
20 transcriptomic analyses revealed 137 differentially expressed genes. Among these candidates,  
21 the BTB/POZ zinc finger transcriptional regulator *Bcl6* was found to be downregulated in  
22 mutants. This phenotype was restricted to *Cux1* and *Satb2* expressing CPN within upper  
23 cortical layers 2 and 3. Further analysis revealed that *Bcl11a* directly controls *Bcl6* expression  
24 through binding to a conserved element within the *Bcl6* promoter.

25

1 Previously, we demonstrated Bcl6 to be required during early phases of neocortical, where Bcl6  
2 promotes the transition of neural progenitors into postmitotic neurons (Bonnefont et al., 2019;  
3 Tiberi et al., 2012). Our data suggest additional functions of Bcl6 in the postnatal development  
4 of postmitotic CPN. A conserved function of this factor in control of cell survival is supported  
5 by its well-characterized functions in the lymphatic system. Bcl6 prevents apoptosis in germinal  
6 center B-cells and exerts oncogenic activity in diffuse large B-cell lymphoma both, through  
7 modulation of the p53 downstream pathway (Cerchiatti et al., 2008; Phan and Dalla-Favera,  
8 2004). In the cerebellum, deletion of *Bcl6* induces massively increased cell death of granule  
9 cell precursors but not postmitotic granule cells leading to reduction of organ size (Tiberi et al.,  
10 2014). Interestingly, activation of nuclear calcium pathway through synaptic NMDA-receptor  
11 signaling induces Bcl6 expression in hippocampal neurons. In turn, upregulation of Bcl6  
12 improves survival of these neurons (Zhang et al., 2007). This suggests, that activity-dependent  
13 as well as activity-independent, transcriptional regulatory pathways converge onto Bcl6 in the  
14 control of DCD.

15 Compared to *Bcl11a* mutants we observed only moderate increase in apoptosis in *Bcl6* mutant  
16 CPN, raising the possibility of additional signals to contribute to apoptosis in *Bcl11a* mutants.  
17 Postnatally, *Bcl11a* mutant CPN display severe morphogenetic defects as characterized by  
18 shortened apical dendrites and disturbed dendritic branching pattern (Wiegrefe et al., 2015).  
19 This may result in impaired synaptic integration and electrical activity of *Bcl11a* mutant neurons  
20 and in turn contribute to the severity of the phenotype. Alternatively, additional, not yet  
21 characterized signals, might be involved.

22  
23 In our screen, we detected several axon guidance molecules, including Slit2, EfnA5, Sema3c, -  
24 3d, -7a, Flrt2, -3 to be deregulated in *Bcl11a* mutant CPN. Semaphorins, for example, have  
25 extensively been demonstrated to influence neuronal connectivity (Koropouli and Kolodkin,  
26 2014). Thus, differentially expressed guidance molecules, as observed in our study, might either

1 directly or indirectly, through modulation of connectivity influence the severity of the apoptosis  
2 phenotype in *Bcl11a* mutants. In addition, we found cadherin 6, 12, 13 and protocadherin 9 to  
3 be deregulated in *Bcl11a* mutant CPN. Recent experimental evidence suggests cadherins, in  
4 addition to their well characterized functions in cell recognition and neural circuit assembly  
5 (Jontes, 2018; Sanes and Zipursky, 2020) to exert survival functions, for example in neocortical  
6 interneurons as well (Lazlo 2020).

7

8 In lymphoid cells Bcl6 regulates cell survival through modulation of the p53 pathway  
9 (Cerchietti et al., 2008; Phan and Dalla-Favera, 2004). While p53 expression was found  
10 unchanged in both, *Bcl11a* and in *Bcl6* mutant CPN, significant upregulation of *Foxo1* in both  
11 *Bcl6* and *Bcl11a* mutants was detected. Bcl11a and Bcl6 were shown to physically interact and  
12 colocalize in nuclear paraspeckles suggesting common regulation of gene expression (Liu et  
13 al., 2006; Nakamura et al., 2000). Members of the Foxo family have been demonstrated to be  
14 involved in the control of neuron survival (Carter and Brunet, 2007; Santo and Paik, 2018). It  
15 might thus well be, that Bcl6 together with Bcl11a exerts anti-apoptotic functions in CPN  
16 through this pathway.

17 The extent of DCD is specific to individual cortical areas. For example, numbers of neurons  
18 eliminated by DCD are substantially higher in the somatomotor as compared to the  
19 somatosensory cortex (Blanquie et al., 2017). Loss of *Bcl11a* in the neocortex has been  
20 previously suggested to result in changed area identity, characterized by the partial motorization  
21 of the *Bcl11a* mutant neocortex defined on a transcriptional level (Greig et al., 2016).  
22 Intriguingly, Bcl6 expression in the wildtype neocortex at P4 is lower in the somatomotor as in  
23 the somatosensory cortex (Greig et al., 2016). Thus, the identification of a Bcl11a/Bcl6-  
24 dependent regulatory pathway of DCD in this study provides additional mechanistic insights  
25 into how Bcl11a contributes to establishing cortical area identity.

26

## 1 **Experimental Procedures**

2

### 3 **Animals**

4 Mice carrying a conditional knockout allele of *Bcl11a* (*Bcl11a<sup>F</sup>*) have previously been  
5 described (John et al., 2012). These mice were crossed to *Emx1<sup>IRESCre</sup>* or *Deleter<sup>Cre</sup>* (Gorski et  
6 al., 2002; Schwenk et al., 1995) mice to generate *Bcl11a<sup>A/+</sup>* heterozygous and conditional  
7 *Bcl11a<sup>F/F</sup>;Emx1<sup>IRESCre</sup>* mutants, respectively. *Bcl11a<sup>F/+</sup>;Emx1<sup>IRESCre</sup>* littermates served as  
8 controls. Mice carrying a conditional knockout allele of *Bcl6* (*Bcl6<sup>F</sup>*) were crossed to *Nex<sup>Cre</sup>*  
9 mice (Goebbels et al., 2006; Hollister et al., 2013) to generate conditional *Bcl6<sup>F/F</sup>;Nex<sup>Cre</sup>*  
10 mutants. *Bcl6<sup>F/F</sup>* littermates without a *Nex<sup>Cre</sup>* allele served as controls. *Bcl6<sup>+/-</sup>* mice have  
11 previously been described (Ye et al., 1997). Genotyping of the mice was performed by PCR.  
12 All mouse experiments were carried out in compliance with German law and approved by the  
13 respective government offices in Tübingen, Germany.

14

### 15 **Immunohistochemistry and RNA *in situ* hybridization**

16 Brains were fixed in 4% PFA in 0.1M phosphate buffer (pH 7.4), embedded in OCT compound  
17 (Polysciences), and frozen sections were prepared at 14  $\mu$ m for immunohistochemistry or 18  
18  $\mu$ m for RNA *in situ* hybridization as previously described (John et al., 2012; Simon et al., 2012).  
19 Paraffin and vibratome sections were prepared at 7  $\mu$ m and 50  $\mu$ m, respectively. All clones for  
20 non-radioactive RNA *in situ* hybridization, except for *Flrt2* and *Flrt3*, which were a gift by  
21 Rüdiger Klein (Max Planck Institute of Neurobiology, Martinsried, Germany), were generated  
22 by reverse transcription PCR and oligonucleotides are listed in supplemental table 1.  
23 The following antibodies were used: guinea pig anti-Bcl11a (John et al., 2012), mouse anti-  
24 Bcl11a (Abcam Cat# ab19487, RRID:AB\_444947), rabbit anti-Bcl11a (John et al., 2012), rat  
25 anti-Bcl11b (Abcam Cat# ab18465, RRID:AB\_2064130), goat anti-Brn2 (Santa Cruz  
26 Biotechnology Cat# sc-6029, RRID:AB\_2167385), rabbit anti-cleaved Caspase 3 (Cell

1 Signaling Technology Cat# 9661, RRID:AB\_2341188), rabbit anti-Cux1 (Santa Cruz  
2 Biotechnology Cat# sc-13024, RRID:AB\_2261231), chicken anti-GFP (Abcam Cat# ab13970,  
3 RRID:AB\_300798), mouse anti-Satb2 (Abcam Cat# ab51502, RRID:AB\_882455), and rabbit  
4 anti-Tbr1 (Abcam Cat# ab31940, RRID:AB\_2200219). To generate anti-Bcl6 antiserum guinea  
5 pigs were injected with a protein comprising amino acids 4-484 of mouse Bcl6 (NP\_033874)  
6 and pooled sera were purified by affinity chromatography. Biotin-conjugated, HRP-conjugated,  
7 and fluorescent secondary antibodies were purchased from Jackson ImmunoResearch. Sections  
8 were counterstained with Dapi (Molecular Probes). Immunohistochemical detection of Bcl6  
9 was performed on paraffin sections with antigen retrieval by boiling the section for 30 minutes  
10 in Tris-EDTA buffer, pH 9.0 and enhanced using tyramide signal amplification (Invitrogen)  
11 according to the manufacturer's instructions or an avidin/biotin-based peroxidase system and  
12 DAB substrate (Vector Laboratories). Cleaved caspase 3 was detected on frozen sections of  
13 conditional *Bcl6* mutants using an avidin/biotin-based peroxidase system and DAB substrate  
14 (Vector Laboratories). All fluorescent images were examined on a TCS SP5II confocal  
15 microscope (Leica) and processed with Adobe Photoshop (RRID:SCR\_014199) software.

16

### 17 **Laser microdissection**

18 All procedures were performed in an RNase-free environment. Cortical layers 2-4 were isolated  
19 from unfixed frozen sections via laser microdissection. Briefly, brains were quickly removed  
20 from the skull, washed in ice-cold PBS, frozen in OCT compound (Polysciences), and stored  
21 at -80°C. Sections were prepared at 20 µm and mounted on membrane-covered 1 mm PEN  
22 slides (Zeiss) that were UV-treated and coated with poly-L-lysine. Sections were fixed in ice-  
23 cold 70% EtOH for 1 min, incubated in 1% cresyl violet acetate solution (Waldeck) for 45 sec,  
24 and washed in 70% EtOH and 100% EtOH for 1 min each. After a brief drying step on a 37°C  
25 warming plate, sections were immediately processed for laser microdissection using a PALM  
26 MicroBeam Rel.4.2 (Zeiss). Laser microdissected tissue was lysed in RLT lysis buffer (Qiagen)

1 containing 2-mercaptoethanol for 30 min on ice and stored at -80°C before total RNA  
2 extraction.

3

#### 4 **Plasmids**

5 *CAG-Ctl<sup>GFP</sup>* and *CAG-Cre<sup>GFP</sup>* have previously been described (Hand et al., 2005; Wiegrefte et  
6 al., 2015). The recombinase *Cre* was from *CAG-Cre<sup>GFP</sup>* and inserted into *pNeuroD-ires-GFP*  
7 (gift of Franck Polleux; RRID:Addgene\_61403) to generate *NeuroD-Cre*. The *ires-GFP*  
8 cassette was cut from *CAG-Ctl<sup>GFP</sup>* and inserted into *pCALNL-GFP* (gift of Connie Cepko;  
9 RRID:Addgene\_13770). *Bcl6* (NM\_009744) was cloned by PCR using a cDNA clone (Cat.No.  
10 MC203091, Origene) as template and inserted into *CAG-Ctl<sup>GFP</sup>* to generate *CAG-LSL-Bcl6<sup>GFP</sup>*.  
11 *CAG-Cre* was a gift of Connie Cepko (RRID:Addgene\_61403).

12

#### 13 ***In utero* electroporation**

14 *In utero* electroporation was performed as previously described (Saito and Nakatsuji, 2001;  
15 Wiegrefte et al., 2017) with minor modifications. Briefly, pregnant dams were anaesthetized  
16 with Isoflurane (Abbott) and 1-2 µL of plasmid DNA were injected per embryo at a  
17 concentration of 0.5-1.0 µg/µL per construct. 5 mm electrodes (Nepagene) and five pulses of  
18 40 V (50 ms ON, 950 ms OFF) generated by a CUY21 EDIT electroporator (Nepagene) were  
19 used to transfect cells in the dorsolateral ventricular zone.

20

#### 21 **Microarray analysis, quantitative real-time PCR, and chromatin immunoprecipitation**

22 Microarray analysis was performed as previously described (John et al., 2012; Simon et al.,  
23 2012) with minor modifications. Briefly, total RNA was isolated from laser-microdissected  
24 control and mutant samples (n = 4) using the RNeasy Micro Plus Kit (Qiagen). The isolated  
25 RNA was checked for purity and integrity using Nanodrop spectrophotometer and TapeStation  
26 (Agilent), respectively. Transcriptome analysis was performed using GeneChip Mouse Gene



1 1.0 ST Arrays (Affymetrix) and BRB-ArrayTools developed by Dr. Richard Simon and BRB-  
2 ArrayTools Development Team (<http://linus.nci.nih.gov/BRB-ArrayTools.html>). The data  
3 obtained in our microarray experiments were deposited at the GEO website under accession  
4 numbers GEO: GSE185287 and GSE185288.

5 Total RNA was reverse transcribed using the SensiFast cDNA Synthesis Kit (Bioline), and  
6 quantitative real-time PCR was performed using the LightCycler DNA Master SYBR Green I  
7 Kit in a LightCycler 480 System (Roche). Oligonucleotides used for quantitative real-time PCR  
8 are listed in supplemental table S2. The relative copy number of *Gapdh* RNA was quantified  
9 and used for normalization. Data were analyzed using the comparative  $C_T$  method (Schmittgen  
10 and Livak, 2008).

11 Chromatin immunoprecipitation (ChIP) was carried out as previously described (Nelson et al.,  
12 2006) with minor modifications. Briefly, P0 cortical tissue was collected from wild-type pups,  
13 flash frozen in liquid nitrogen, and stored at  $-80^{\circ}\text{C}$  until ChIP. Tissue was disrupted in low  
14 sucrose buffer (320mM sucrose, 10mM HEPES, pH 8.0, 5mM  $\text{CaCl}_2$ , 3mM  $\text{Mg}[\text{CH}_3\text{COO}]_2$ ,  
15 1mM DTT, 0.1mM EDTA, 0.1% Triton X-100) and fixed for 15 min at RT in 1%  
16 formaldehyde. After quenching with glycine solution, nuclei were washed in Nelson buffer  
17 (140mM NaCl, 20mM EDTA, pH 8.0, 50mM Tris, pH 8.0, 1% Triton X-100, 0.5% NP-40) and  
18 disrupted in RIPA buffer (140 mM NaCl, 10mM Tris, pH 8.0, 1mM EDTA, pH 8.0, 1% SDS,  
19 1% Triton X-100, 0.1% NaDOC). Chromatin was sonicated for 40 cycles (30 sec ON/OFF)  
20 using a Bioruptor Plus (Diagenode) with high power settings. For each ChIP reaction 15  $\mu\text{g}$  of  
21 sheared chromatin was diluted ten times with IP buffer (50mM Tris, pH 8.0, 150 mM NaCl,  
22 1% NP-40, 0.5% NaDOC, 20mM EDTA, pH 8.0, 0.1% SDS) and incubated overnight at  $4^{\circ}\text{C}$   
23 with 3  $\mu\text{L}$  specific mouse monoclonal antibody recognizing Bcl11a (Abcam Cat# ab19487,  
24 RRID:AB\_444947) or unspecific IgG1 antibody (Cell Signaling Technology Cat# 5415,  
25 RRID:AB\_10829607), which served as a negative control. 20  $\mu\text{L}$  of protein G magnetic beads  
26 (Invitrogen) were added to each ChIP reaction for two hours at  $4^{\circ}\text{C}$ . After washing with IP

1 buffer containing 0.1% SDS, LiCl buffer (500mM LiCl, 100mM Tris, pH 8.0, 1% NP-40, 1%  
2 NaDOC, 20mM EDTA, pH 8.0), and TE buffer (10mM Tris, pH 8.0, 1mM EDTA, pH 8.0),  
3 DNA was eluted from beads and purified by phenol-chloroform extraction. The precipitated  
4 DNA was analyzed by quantitative real-time PCR using oligonucleotides recognizing a  
5 conserved Bcl11a binding motif (TGACCA) in the first intron of *Bcl6*. As negative controls,  
6 oligonucleotides were used recognizing a region of exon 5 of *Bcl6* and the *Hprt* promoter  
7 region, respectively. All oligonucleotide sequences are listed in supplemental table S1. ChIP  
8 quantitative real-time PCR data were analyzed by the comparative  $C_T$  method determining the  
9 fold enrichment of the immunoprecipitated DNA by the specific antibody versus IgG1 using  
10 the input as a reference.

11

## 12 **Cell culture and western blotting**

13 HEK293 cells were grown in DMEM with 10% fetal calf serum and 1% penicillin/streptomycin  
14 at 37°C under 5% CO<sub>2</sub> atmosphere. Cells were transfected using Lipofectamine 2000 according  
15 to the manufacturer's instructions (Invitrogen). Total proteins were extracted with ice-cold lysis  
16 buffer (1% NP-40, 150mM NaCl, 50mM Tris, pH 8.0, 1mM EDTA), separated by SDS-PAGE,  
17 and electrophoretically transferred onto PVDF membranes (Amersham). Membranes were  
18 blocked with 5% non-fat milk (Bio-Rad) and incubated with mouse anti-beta-actin (Abcam  
19 Cat# ab8226, RRID:AB\_306371), rabbit anti-Bcl6 (Santa Cruz Biotechnology Cat# sc-858,  
20 RRID:AB\_2063450), and chicken anti-GFP (Abcam Cat# ab13970, RRID:AB\_300798),  
21 followed by treatment with horseradish peroxidase-conjugated secondary antibodies (Jackson  
22 ImmunoResearch) and ECL Plus western blotting detection reagents according to the  
23 manufacturer's instructions (ThermoScientific).

24

## 25 **Cell counts and statistical analysis**

1 For each experiment, at least three control and three mutant brains were analyzed, and three to  
2 five sections per brain were quantified. Anatomically matched sections were selected from an  
3 antero-posterior level between the anterior commissure and the dorsal hippocampus. Stained  
4 cells were counted in radial units of 100  $\mu\text{m}$  (Fig. 2, 3, S5), 350  $\mu\text{m}$  (Fig. 4C-E), or 750  $\mu\text{m}$   
5 (Fig. 4H) width in the presumptive somatosensory cortex or in the entire neocortex (Fig. 5).  
6 Cells were counted using ImageJ (RRID:SCR\_003070) and Imaris (RRID:SCR:007370)  
7 software. Statistical analysis was done with Microsoft Excel (RRID:SCR\_016137) or  
8 GraphPad Prism (RRID:SCR\_002798) software. Venn diagrams were generated using  
9 MATLAB (RRID:SCR\_001622) software. Significance between groups was assessed using a  
10 two-tailed Student's t test or one-way ANOVA, followed by Tuckey's post hoc test. P values  
11  $< 0.05$  were considered statistically significant.

12

13

## 14 **Acknowledgements**

15 We are grateful to C. Cepko (Harvard Medical School, Boston), K.-A. Nave (Max-Planck-  
16 Institute for Experimental Medicine, Göttingen), F. Polleux (Columbia University, New York)  
17 for the gift of mice and providing DNA plasmids. We thank K. Holzmann of the core facility  
18 "Genomics" and the staff of core facility "Laser Microdissection" of the Medical Faculty of  
19 Ulm University. We thank J. Andratschke, L. Schmid, and D. Krattenmacher for excellent  
20 technical assistance. This work was supported by grants from the Deutsche  
21 Forschungsgemeinschaft to S.B. (BR 2215/1-2), Ulm University (Bausteinprogramm 3.2) to  
22 C.W. and the German Academic Scholarship Foundation to T.W.

23

24

## 25 **Author contributions**

1 C.W. and S.B. designed the experiments. C.W., T.W., N.J., conducted the experiments and  
2 analyzed the data. J.B. and P.V. provided mice and reagents. C.W. and S.B. wrote the  
3 manuscript

4

5

## 6 **Conflict of interests**

7 The authors declare that they have no conflict of interest.

8

## 1 **Figure legends**

2

### 3 **Figure 1. Identification of downstream candidate target genes of Bcl11a in superficial cortical** 4 **layers at early postnatal development**

5 (A) Cortical layers 2-4 was isolated by laser microdissection in 4 replicates from *Bcl11a<sup>F/F</sup>;Emx1<sup>IRESCre</sup>*  
6 and control neocortex. (B) Gene expression was compared using microarrays. From a set of 139  
7 differentially expressed (DE) genes candidate targets were selected based on gene ontology (GO) and  
8 Pubmed analyses and verified by quantitative real-time PCR and RNA *in situ* hybridization. (C) Volcano  
9 plot showing DE genes (red). Those not significantly changed (fold change < 1.5;  $p > 0.05$ ) are shaded  
10 black. Bcl11a and Bcl6 are highlighted in green. (D) Relative *Bcl6* mRNA expression level determined  
11 by quantitative real-time PCR is decreased in laser microdissected cortical tissue of P2  
12 *Bcl11a<sup>F/F</sup>;Emx1<sup>IRESCre</sup>* compared to control brains (n = 4). (E) RNA *in situ* hybridization showing  
13 downregulation of *Bcl6* expression in *Bcl11a<sup>F/F</sup>;Emx1<sup>IRESCre</sup>* compared to control neocortex at E17.5,  
14 P0, P2, and P4. Student's t test; \*\*  $p > 0.01$ ; Scale bars, 100  $\mu\text{m}$  (A) and 50  $\mu\text{m}$  (E).

15

### 16 **Figure 2. Bcl6 is expressed in superficial callosal projection neurons and a target gene of Bcl11a**

17 (A) Immunohistochemistry of Bcl6 (red), Bcl11a (green), and Satb2 (blue) in P2 wild-type neocortex.  
18 (B) Venn diagram displaying the proportions of Bcl6 neurons overlapping with Bcl11a and Satb2  
19 expressing cells. The percentage of each labeled cell population is given in relation to all labeled cells  
20 (Bcl6<sup>+</sup> and Bcl11a<sup>+</sup> and Satb2<sup>+</sup>, in total 4479 cells). (C) Immunohistochemistry of Bcl6 (red), Bcl11a  
21 (green), and Cux1 (blue) in P2 wild-type neocortex. (D) Venn diagram displaying the proportions of  
22 Bcl6 neurons overlapping with Bcl11a and Cux1 expressing cells. The percentage of each labeled cell  
23 population is given in relation to all labeled cells (Bcl6<sup>+</sup> and Bcl11a<sup>+</sup> and Cux1<sup>+</sup>, in total 4301 cells). (E)  
24 Scheme of the *Bcl6* gene locus displaying the start codon (ATG) at +11.2 kb relative to the  
25 transcriptional start site (TSS). A regulatory element (RE) in the first intron at +982 bp contains a  
26 conserved binding motif (TGACCA, in red) of Bcl11a. (F) ChIP analysis using a Bcl11a antibody and  
27 P2 cortical tissue detects Bcl11a binding to the RE shown in (E). Negative controls include ChIP with

1 unspecific IgG antibody and the precipitation of exon 5 of *Bcl6* (n = 4). Student's t test; \* P < 0.05.

2 Scale bars, 50  $\mu$ m.

3

4 **Figure 3. Bcl6 expression is specifically downregulated in superficial cortical layers of**  
5 ***Bcl11a*<sup>F/F</sup>;*Emx1*<sup>IRESCre</sup> neocortex**

6 (A) Immunohistochemistry of Bcl6 (red), Cux1 (green), and Satb2 (blue) in P2 *Bcl11a*<sup>F/F</sup>;*Emx1*<sup>IRESCre</sup>

7 and control neocortex. Nuclei are stained with Dapi (white). (B) Relative quantification of Bcl6<sup>+</sup>, Satb2<sup>+</sup>,

8 and Cux1<sup>+</sup> cells in *Bcl11a*<sup>F/F</sup>;*Emx1*<sup>IRESCre</sup> and control neocortex (n = 4). (C) Numbers of Cux1<sup>+</sup> or Satb2<sup>+</sup>

9 cells that coexpress Bcl6 are reduced in *Bcl11a*<sup>F/F</sup>;*Emx1*<sup>IRESCre</sup> compared to control neocortex (n = 4).

10 Student's t test; \*\*\* p < 0.001. Scale bar, 50  $\mu$ m.

11

12 **Figure 4. Cell autonomous loss of *Bcl11a* in superficial cortical layers leads to reduced Bcl6**  
13 **expression and reintroduction of *Bcl6* into *Bcl11a* mutant superficial projection neurons rescues**  
14 **the *Bcl11a* mutant phenotype**

15 (A) Schematic representation of the experimental approach. Embryos are electroporated at E15.5 with

16 the indicated DNA plasmids and sacrificed at either P2 or P5. (B) DNA plasmids used in the experiment

17 shown in C-F. (C-E) Immunohistochemistry of electroporated P2 *Bcl11a*<sup>F/F</sup> neurons in superficial

18 cortical layers with GFP (green) and Bcl6 (red, C), Cux1 (red, D), or Satb2 (red, E) antibodies. Bcl6

19 expression is specifically downregulated *Bcl11a*<sup>F/F</sup> neocortex upon electroporation of *CAG-Cre*<sup>GFP</sup> in

20 comparison to *CAG-Ctl*<sup>GFP</sup> control plasmid. Nuclei are stained with Dapi (white). (F) Quantification of

21 the percentage of electroporated cells expressing Bcl6 (n = 3), Satb2 (n = 3), and Cux1 (n = 5). Results

22 are expressed as mean  $\pm$  SEM; Student's t test; \*\*\* p < 0.001. (G) DNA plasmids used in the experiment

23 shown in H and I. (H) Immunohistochemistry of electroporated P5 *Bcl11a* <sup>$\Delta$ F</sup> and *Bcl11a*<sup>+F</sup> neurons in

24 superficial cortical layers with GFP (green) and cleaved caspase 3 (CC3, magenta) antibodies.

25 Electroporation of *Neurod-Cre*<sup>GFP</sup> plasmid together with *CAG-LSL-Bcl6*<sup>GFP</sup> into *Bcl11a*<sup>F/F</sup> neocortex

26 reduces the number of CC3<sup>+</sup> cells to control levels. (I) Quantification of the experiment shown in (H) (n

27 = 4). Results are expressed as mean  $\pm$  SEM; one-way ANOVA followed by Tukey's post hoc test; \*\*\*

28 p < 0.001. Scale bars, 20  $\mu$ m (C-E), 50  $\mu$ m (H).

1 **Figure 5. Postnatal developmental cell death is increased in *Bcl6<sup>F/F</sup>;Nex<sup>Cre</sup>* neocortex**

2 (A) Immunohistochemistry of cleaved caspase 3 (CC3) shows that the number of CC3<sup>+</sup> cells is increased  
3 in P5 *Bcl6<sup>F/F</sup>;Nex<sup>Cre</sup>* compared to control neocortex. Insets are enlargements of the boxed areas in  
4 corresponding panels. (B) Relative *Bcl6* mRNA expression level determined by quantitative real-time  
5 PCR using primers targeting a region of exon 8 is decreased in E15.5 *Bcl6<sup>F/F</sup>;Nex<sup>Cre</sup>* compared to control  
6 neocortex. (C) Quantification of the experiment shown in (A) (n = 3). (D) Quantification of neocortical  
7 area in P5 *Bcl6<sup>F/F</sup>;Nex<sup>Cre</sup>* and control brains (n = 3). (E) Heat map showing differentially expressed genes  
8 in laser microdissected superficial cortical layers of P5 *Bcl6<sup>F/F</sup>;Nex<sup>Cre</sup>* compared to control brains (n =  
9 4). (F) Relative *Foxo1* mRNA expression level determined by quantitative real-time PCR is increased  
10 in laser microdissected superficial cortical layers of P5 *Bcl6<sup>F/F</sup>;Nex<sup>Cre</sup>* compared to control brains (n =  
11 4). (G) RNA *in situ* hybridization showing upregulation of *Foxo1* expression in P5 *Bcl6<sup>F/F</sup>;Nex<sup>Cre</sup>*  
12 compared to control neocortex. All graphs represent mean ± SEM; Student's t test; \* p > 0.05; \*\* p <  
13 0.01. Scale bars, 500 μm (A), 50 μm (G).

14

15

16 **Supplementary figure legends**

17

18 **Supplementary Figure S1. Heat map of differentially expressed genes in upper layers of P2**  
19 ***Bcl11a<sup>F/F</sup>;Emx1<sup>IRESCre</sup>* compared to control neocortex.**

20 Heat map showing 79 upregulated genes in green and 58 downregulated genes in red in upper  
21 neocortical layers conditional *Emx1<sup>IRESCre</sup>;Bcl11a<sup>F/F</sup>* mutants (*Bcl11a* cKO) compared to controls at  
22 postnatal day 2.

23

24 **Supplementary Figure S2. Selected candidate downstream target genes of *Bcl11a* in superficial**  
25 **cortical layers at early postnatal development**

26 (A) Volcano plot showing differentially expressed (DE) genes in laser microdissected cortical layers 2-  
27 4 of *Bcl11a<sup>F/F</sup>;Emx1<sup>IRESCre</sup>* neocortex compared to controls. DE genes not significantly changed (fold  
28 change < 1.5; p > 0.05) are shaded black. *Cdh6*, *Cdh12*, *Efna5*, *Pcdh9*, *Cdh13*, *Flrt2*, *Flrt3*, and *Slit2*

1 are highlighted in green. (B) Relative mRNA expression levels of select DE genes determined by  
2 quantitative real-time PCR in laser microdissected cortical tissue of P2 *Bcl11a<sup>F/F</sup>;Emx1<sup>IRESCre</sup>* and  
3 control brains (n = 4). Graph represents mean ± SEM; Student's t test; \* p > 0.05; \*\* p < 0.01; \*\*\* p <  
4 0.01. (C) RNA *in situ* hybridization of selected DE genes with decreased expression in P2  
5 *Bcl11a<sup>F/F</sup>;Emx1<sup>IRESCre</sup>* compared to control neocortex. (D) RNA *in situ* hybridization of select DE genes  
6 with increased expression in P2 *Bcl11a<sup>F/F</sup>;Emx1<sup>IRESCre</sup>* compared to control neocortex. Scale bar, 50 μm.

7  
8 **Supplementary Figure S3. Specificity of Bcl6 antibody shown by immunohistochemistry**

9 Immunohistochemistry of Bcl6 using guinea pig anti-Bcl6 antibody in P0 *Bcl6<sup>-/-</sup>* and wildtype neocortex.  
10 Bcl6 expression is detectable in upper layers and at lower levels in deep layers of wildtype neocortex.  
11 In *Bcl6<sup>-/-</sup>* mutants Bcl6 expression is not detectable. Scale bar, 50 μm.

12  
13 **Supplementary Figure S4. Relative Bcl6 expression is unchanged in deep cortical layers of**  
14 ***Bcl11a<sup>F/F</sup>;Emx1<sup>IRESCre</sup>* compared to control neocortex**

15 (A) Immunohistochemistry of Bcl6 (red), Bcl11b (green), and Tbr1 (blue) in P2 *Bcl11a<sup>F/F</sup>;Emx1<sup>IRESCre</sup>*  
16 and control neocortex. Bcl6 and Tbr1 expressions are downregulated while Bcl11b expression is  
17 upregulated in *Bcl11a<sup>F/F</sup>;Emx1<sup>IRESCre</sup>* compared to control neocortex. Nuclei are stained with Dapi  
18 (white). (B) Relative quantification of Bcl6<sup>+</sup>, Bcl11b<sup>+</sup>, and Tbr1<sup>+</sup> cells in *Bcl11a<sup>F/F</sup>;Emx1<sup>IRESCre</sup>* and  
19 control neocortex (n = 4). (C) Numbers of Bcl11b<sup>+</sup> or Tbr1<sup>+</sup> cells that coexpress Bcl6 are normal in  
20 *Bcl11a<sup>F/F</sup>;Emx1<sup>IRESCre</sup>* compared to control neocortex (n = 4). Student's t test; \*\* p < 0.01; \*\*\* p < 0.001.  
21 Scale bar, 50 μm.

22  
23 **Supplementary Figure S5. Western blot analysis of Cre-dependent DNA plasmids for**  
24 **overexpression of Bcl6 cDNA**

25 (A) DNA plasmids used for transfection of HEK293 cells. (B) Western Blot analysis of total protein  
26 lysates shows that *CAG-LSL-Bcl6<sup>GFP</sup>* plasmid expresses *Bcl6* only in the presence *CAG-Cre* plasmid.  
27 Note that GFP is expressed independent of *pCAG-Cre*. Gapdh served as protein loading control.

28



1 **Supplementary Table 1: Differentially expressed gene in upper cortical layers of P2 *Bcl11a* cKO**  
2 **compared to controls**

3 List of the genes identified by microarray analysis that are differentially expressed in upper layers of P2  
4 *Emx1*<sup>IRESCre</sup>; *Bcl11a*<sup>F/F</sup> (*Bcl11a* cKO) compared to control neocortex.

5  
6 **Supplementary Table 2: Primers used in this study.**

7  
8  
9 **References**

- 10  
11 Alcamo, E.A., Chirivella, L., Dautzenberg, M., Dobрева, G., Farinas, I., Grosschedl, R., and  
12 McConnell, S.K. (2008). *Satb2* regulates callosal projection neuron identity in the developing  
13 cerebral cortex. *Neuron* 57, 364-377.
- 14 Avram, D., Fields, A., Senawong, T., Topark-Ngarm, A., and Leid, M. (2002). COUP-TF  
15 (chicken ovalbumin upstream promoter transcription factor)-interacting protein 1 (CTIP1) is a  
16 sequence-specific DNA binding protein. *Biochem J* 368, 555-563.
- 17 Blanquie, O., Yang, J.W., Kilb, W., Sharopov, S., Sinning, A., and Luhmann, H.J. (2017).  
18 Electrical activity controls area-specific expression of neuronal apoptosis in the mouse  
19 developing cerebral cortex. *Elife* 6.
- 20 Blaschke, A.J., Staley, K., and Chun, J. (1996). Widespread programmed cell death in  
21 proliferative and postmitotic regions of the fetal cerebral cortex. *Development* 122, 1165-1174.
- 22 Bonnefont, J., Tiberi, L., van den Amele, J., Potier, D., Gaber, Z.B., Lin, X., Bilheu, A.,  
23 Herpoel, A., Velez Bravo, F.D., Guillemot, F., *et al.* (2019). Cortical Neurogenesis Requires  
24 Bcl6-Mediated Transcriptional Repression of Multiple Self-Renewal-Promoting Extrinsic  
25 Pathways. *Neuron* 103, 1096-1108 e1094.
- 26 Britanova, O., de Juan Romero, C., Cheung, A., Kwan, K.Y., Schwark, M., Gyorgy, A., Vogel,  
27 T., Akopov, S., Mitkovski, M., Agoston, D., *et al.* (2008). *Satb2* is a postmitotic determinant  
28 for upper-layer neuron specification in the neocortex. *Neuron* 57, 378-392.
- 29 Carter, M.E., and Brunet, A. (2007). FOXO transcription factors. *Curr Biol* 17, R113-114.
- 30 Causeret, F., Coppola, E., and Pierani, A. (2018). Cortical developmental death: selected to  
31 survive or fated to die. *Curr Opin Neurobiol* 53, 35-42.
- 32 Cerchietti, L.C., Polo, J.M., Da Silva, G.F., Farinha, P., Shaknovich, R., Gascoyne, R.D.,  
33 Dowdy, S.F., and Melnick, A. (2008). Sequential transcription factor targeting for diffuse large  
34 B-cell lymphomas. *Cancer Res* 68, 3361-3369.
- 35 Chowdhury, T.G., Jimenez, J.C., Bomar, J.M., Cruz-Martin, A., Cantle, J.P., and Portera-  
36 Cailliau, C. (2010). Fate of cajal-retzius neurons in the postnatal mouse neocortex. *Front*  
37 *Neuroanat* 4, 10.
- 38 de la Rosa, E.J., and de Pablo, F. (2000). Cell death in early neural development: beyond the  
39 neurotrophic theory. *Trends Neurosci* 23, 454-458.
- 40 Denaxa, M., Neves, G., Burrone, J., and Pachnis, V. (2018). Homeostatic Regulation of  
41 Interneuron Apoptosis During Cortical Development. *J Exp Neurosci* 12, 1179069518784277.

- 1 Eriksson, S.H., Thom, M., Heffernan, J., Lin, W.R., Harding, B.N., Squier, M.V., and Sisodiya,  
2 S.M. (2001). Persistent reelin-expressing Cajal-Retzius cells in polymicrogyria. *Brain* *124*,  
3 1350-1361.
- 4 Goebbels, S., Bormuth, I., Bode, U., Hermanson, O., Schwab, M.H., and Nave, K.A. (2006).  
5 Genetic targeting of principal neurons in neocortex and hippocampus of NEX-Cre mice.  
6 *Genesis* *44*, 611-621.
- 7 Gorski, J.A., Talley, T., Qiu, M., Puelles, L., Rubenstein, J.L., and Jones, K.R. (2002). Cortical  
8 excitatory neurons and glia, but not GABAergic neurons, are produced in the *Emx1*-expressing  
9 lineage. *J Neurosci* *22*, 6309-6314.
- 10 Greig, L.C., Woodworth, M.B., Greppi, C., and Macklis, J.D. (2016). *Ctip1* Controls  
11 Acquisition of Sensory Area Identity and Establishment of Sensory Input Fields in the  
12 Developing Neocortex. *Neuron* *90*, 261-277.
- 13 Hand, R., Bortone, D., Mattar, P., Nguyen, L., Heng, J.I., Guerrier, S., Boutt, E., Peters, E.,  
14 Barnes, A.P., Parras, C., *et al.* (2005). Phosphorylation of Neurogenin2 specifies the migration  
15 properties and the dendritic morphology of pyramidal neurons in the neocortex. *Neuron* *48*, 45-  
16 62.
- 17 Hollister, K., Kusam, S., Wu, H., Clegg, N., Mondal, A., Sawant, D.V., and Dent, A.L. (2013).  
18 Insights into the role of *Bcl6* in follicular Th cells using a new conditional mutant mouse model.  
19 *J Immunol* *191*, 3705-3711.
- 20 Huang, E.J., and Reichardt, L.F. (2001). Neurotrophins: roles in neuronal development and  
21 function. *Annu Rev Neurosci* *24*, 677-736.
- 22 John, A., Brylka, H., Wiegrefe, C., Simon, R., Liu, P., Juttner, R., Crenshaw, E.B., 3rd, Luyten,  
23 F.P., Jenkins, N.A., Copeland, N.G., *et al.* (2012). *Bcl11a* is required for neuronal  
24 morphogenesis and sensory circuit formation in dorsal spinal cord development. *Development*  
25 *139*, 1831-1841.
- 26 Jontes, J.D. (2018). The Cadherin Superfamily in Neural Circuit Assembly. *Cold Spring Harb*  
27 *Perspect Biol* *10*.
- 28 Koropouli, E., and Kolodkin, A.L. (2014). Semaphorins and the dynamic regulation of synapse  
29 assembly, refinement, and function. *Curr Opin Neurobiol* *27*, 1-7.
- 30 Kuida, K., Zheng, T.S., Na, S., Kuan, C., Yang, D., Karasuyama, H., Rakic, P., and Flavell,  
31 R.A. (1996). Decreased apoptosis in the brain and premature lethality in CPP32-deficient mice.  
32 *Nature* *384*, 368-372.
- 33 Ledonne, F., Orduz, D., Mercier, J., Vigier, L., Grove, E.A., Tissir, F., Angulo, M.C., Pierani,  
34 A., and Coppola, E. (2016). Targeted Inactivation of *Bax* Reveals a Subtype-Specific  
35 Mechanism of Cajal-Retzius Neuron Death in the Postnatal Cerebral Cortex. *Cell Rep* *17*, 3133-  
36 3141.
- 37 Liu, H., Ippolito, G.C., Wall, J.K., Niu, T., Probst, L., Lee, B.S., Pulford, K., Banham, A.H.,  
38 Stockwin, L., Shaffer, A.L., *et al.* (2006). Functional studies of *BCL11A*: characterization of  
39 the conserved *BCL11A*-XL splice variant and its interaction with *BCL6* in nuclear paraspeckles  
40 of germinal center B cells. *Mol Cancer* *5*, 18.
- 41 Liu, N., Hargreaves, V.V., Zhu, Q., Kurland, J.V., Hong, J., Kim, W., Sher, F., Macias-Trevino,  
42 C., Rogers, J.M., Kurita, R., *et al.* (2018). Direct Promoter Repression by *BCL11A* Controls  
43 the Fetal to Adult Hemoglobin Switch. *Cell* *173*, 430-442 e417.
- 44 Molyneaux, B.J., Arlotta, P., Menezes, J.R., and Macklis, J.D. (2007). Neuronal subtype  
45 specification in the cerebral cortex. *Nat Rev Neurosci* *8*, 427-437.
- 46 Nakamura, A., Swahari, V., Plestant, C., Smith, I., McCoy, E., Smith, S., Moy, S.S., Anton,  
47 E.S., and Deshmukh, M. (2016). *Bcl-xL* Is Essential for the Survival and Function of  
48 Differentiated Neurons in the Cortex That Control Complex Behaviors. *J Neurosci* *36*, 5448-  
49 5461.

- 1 Nakamura, T., Yamazaki, Y., Saiki, Y., Moriyama, M., Largaespada, D.A., Jenkins, N.A., and  
2 Copeland, N.G. (2000). Evi9 encodes a novel zinc finger protein that physically interacts with  
3 BCL6, a known human B-cell proto-oncogene product. *Mol Cell Biol* 20, 3178-3186.
- 4 Nelson, J.D., Denisenko, O., and Bomsztyk, K. (2006). Protocol for the fast chromatin  
5 immunoprecipitation (ChIP) method. *Nat Protoc* 1, 179-185.
- 6 Nieto, M., Monuki, E.S., Tang, H., Imitola, J., Haubst, N., Khoury, S.J., Cunningham, J., Gotz,  
7 M., and Walsh, C.A. (2004). Expression of Cux-1 and Cux-2 in the subventricular zone and  
8 upper layers II-IV of the cerebral cortex. *J Comp Neurol* 479, 168-180.
- 9 Phan, R.T., and Dalla-Favera, R. (2004). The BCL6 proto-oncogene suppresses p53 expression  
10 in germinal-centre B cells. *Nature* 432, 635-639.
- 11 Phan, R.T., Saito, M., Basso, K., Niu, H., and Dalla-Favera, R. (2005). BCL6 interacts with the  
12 transcription factor Miz-1 to suppress the cyclin-dependent kinase inhibitor p21 and cell cycle  
13 arrest in germinal center B cells. *Nat Immunol* 6, 1054-1060.
- 14 Priya, R., Paredes, M.F., Karayannis, T., Yusuf, N., Liu, X., Jaglin, X., Graef, I., Alvarez-  
15 Buylla, A., and Fishell, G. (2018). Activity Regulates Cell Death within Cortical Interneurons  
16 through a Calcineurin-Dependent Mechanism. *Cell Rep* 22, 1695-1709.
- 17 Ranuncolo, S.M., Polo, J.M., Dierov, J., Singer, M., Kuo, T., Grealley, J., Green, R., Carroll,  
18 M., and Melnick, A. (2007). Bcl-6 mediates the germinal center B cell phenotype and  
19 lymphomagenesis through transcriptional repression of the DNA-damage sensor ATR. *Nat*  
20 *Immunol* 8, 705-714.
- 21 Roth, K.A., Kuan, C., Haydar, T.F., D'Sa-Eipper, C., Shindler, K.S., Zheng, T.S., Kuida, K.,  
22 Flavell, R.A., and Rakic, P. (2000). Epistatic and independent functions of caspase-3 and Bcl-  
23 X(L) in developmental programmed cell death. *Proc Natl Acad Sci U S A* 97, 466-471.
- 24 Saito, T., and Nakatsuji, N. (2001). Efficient gene transfer into the embryonic mouse brain  
25 using in vivo electroporation. *Dev Biol* 240, 237-246.
- 26 Sanes, J.R., and Zipursky, S.L. (2020). Synaptic Specificity, Recognition Molecules, and  
27 Assembly of Neural Circuits. *Cell* 181, 536-556.
- 28 Santo, E.E., and Paik, J. (2018). FOXO in Neural Cells and Diseases of the Nervous System.  
29 *Curr Top Dev Biol* 127, 105-118.
- 30 Schmittgen, T.D., and Livak, K.J. (2008). Analyzing real-time PCR data by the comparative  
31 C(T) method. *Nat Protoc* 3, 1101-1108.
- 32 Schwenk, F., Baron, U., and Rajewsky, K. (1995). A cre-transgenic mouse strain for the  
33 ubiquitous deletion of loxP-flanked gene segments including deletion in germ cells. *Nucleic*  
34 *Acids Res* 23, 5080-5081.
- 35 Simon, R., Brylka, H., Schwegler, H., Venkataramanappa, S., Andratschke, J., Wiegreffe, C.,  
36 Liu, P., Fuchs, E., Jenkins, N.A., Copeland, N.G., *et al.* (2012). A dual function of Bcl11b/Ctip2  
37 in hippocampal neurogenesis. *EMBO J* 31, 2922-2936.
- 38 Southwell, D.G., Paredes, M.F., Galvao, R.P., Jones, D.L., Froemke, R.C., Sebe, J.Y., Alfaro-  
39 Cervello, C., Tang, Y., Garcia-Verdugo, J.M., Rubenstein, J.L., *et al.* (2012). Intrinsically  
40 determined cell death of developing cortical interneurons. *Nature* 491, 109-113.
- 41 Tiberi, L., Bonnefont, J., van den Ameele, J., Le Bon, S.D., Herpoel, A., Bilheu, A., Baron,  
42 B.W., and Vanderhaeghen, P. (2014). A BCL6/BCOR/SIRT1 complex triggers neurogenesis  
43 and suppresses medulloblastoma by repressing Sonic Hedgehog signaling. *Cancer Cell* 26, 797-  
44 812.
- 45 Tiberi, L., van den Ameele, J., Dimidschstein, J., Piccirilli, J., Gall, D., Herpoel, A., Bilheu, A.,  
46 Bonnefont, J., Iacovino, M., Kyba, M., *et al.* (2012). BCL6 controls neurogenesis through Sirt1-  
47 dependent epigenetic repression of selective Notch targets. *Nat Neurosci* 15, 1627-1635.
- 48 Verney, C., Takahashi, T., Bhide, P.G., Nowakowski, R.S., and Caviness, V.S., Jr. (2000).  
49 Independent controls for neocortical neuron production and histogenetic cell death. *Dev*  
50 *Neurosci* 22, 125-138.

- 1 Wei, H., Alberts, I., and Li, X. (2014). The apoptotic perspective of autism. *Int J Dev Neurosci*  
2 36, 13-18.
- 3 Wiegrefe, C., Feldmann, S., Gaessler, S., and Britsch, S. (2017). Time-lapse Confocal Imaging  
4 of Migrating Neurons in Organotypic Slice Culture of Embryonic Mouse Brain Using In Utero  
5 Electroporation. *J Vis Exp*.
- 6 Wiegrefe, C., Simon, R., Peschkes, K., Kling, C., Strehle, M., Cheng, J., Srivatsa, S., Liu, P.,  
7 Jenkins, N.A., Copeland, N.G., *et al.* (2015). *Bcl11a* (*Ctip1*) Controls Migration of Cortical  
8 Projection Neurons through Regulation of *Sema3c*. *Neuron* 87, 311-325.
- 9 Wong, F.K., Bercsenyi, K., Sreenivasan, V., Portales, A., Fernandez-Otero, M., and Marin, O.  
10 (2018). Pyramidal cell regulation of interneuron survival sculpts cortical networks. *Nature* 557,  
11 668-673.
- 12 Wong, F.K., and Marin, O. (2019). Developmental Cell Death in the Cerebral Cortex. *Annu*  
13 *Rev Cell Dev Biol* 35, 523-542.
- 14 Woodworth, M.B., Greig, L.C., Liu, K.X., Ippolito, G.C., Tucker, H.O., and Macklis, J.D.  
15 (2016). *Ctip1* Regulates the Balance between Specification of Distinct Projection Neuron  
16 Subtypes in Deep Cortical Layers. *Cell Rep* 15, 999-1012.
- 17 Ye, B.H., Cattoretti, G., Shen, Q., Zhang, J., Hawe, N., de Waard, R., Leung, C., Nouri-Shirazi,  
18 M., Orazi, A., Chaganti, R.S., *et al.* (1997). The BCL-6 proto-oncogene controls germinal-  
19 centre formation and Th2-type inflammation. *Nat Genet* 16, 161-170.
- 20 Zhang, S.J., Steijaert, M.N., Lau, D., Schutz, G., Delucinge-Vivier, C., Descombes, P., and  
21 Bading, H. (2007). Decoding NMDA receptor signaling: identification of genomic programs  
22 specifying neuronal survival and death. *Neuron* 53, 549-562.
- 23

Wiegrefe et al.  
Figure 1

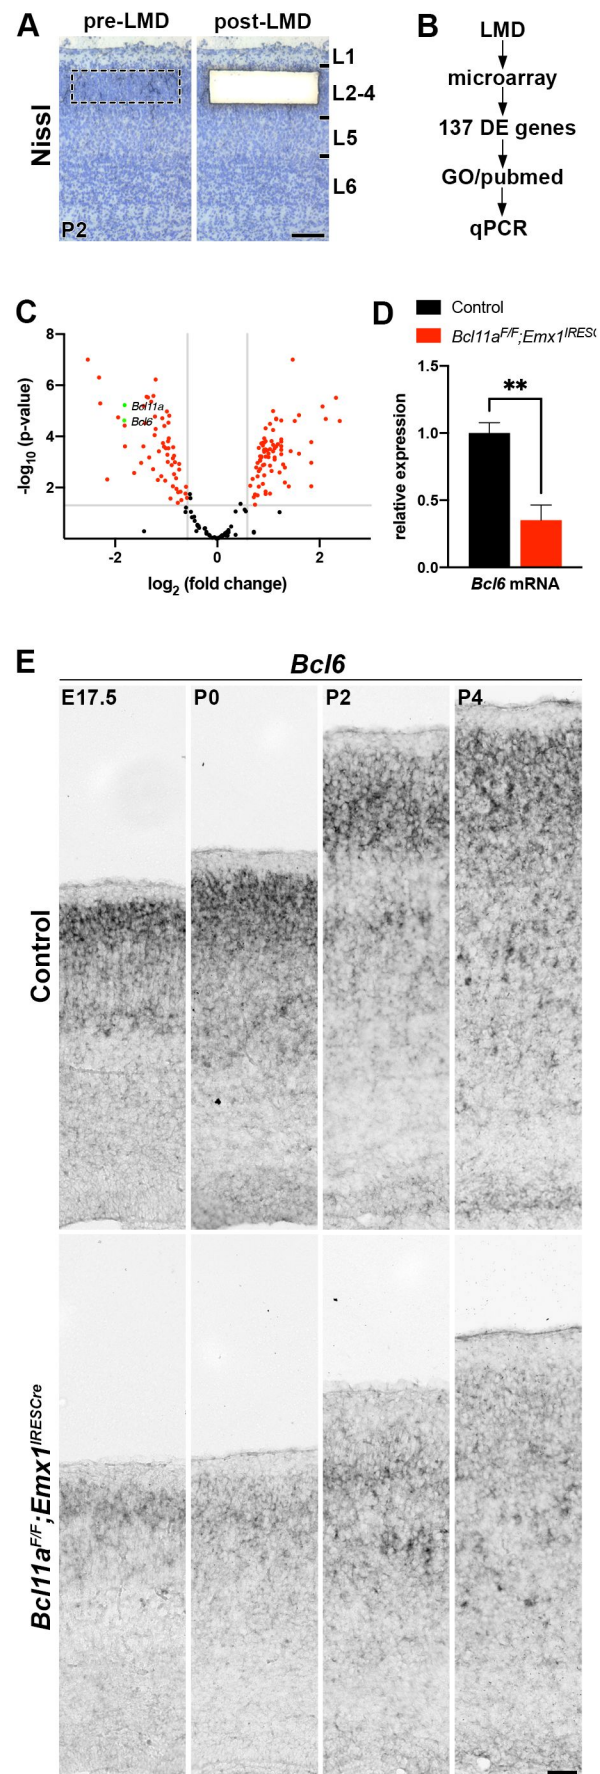



Wiegrefe et al.  
Figure 2

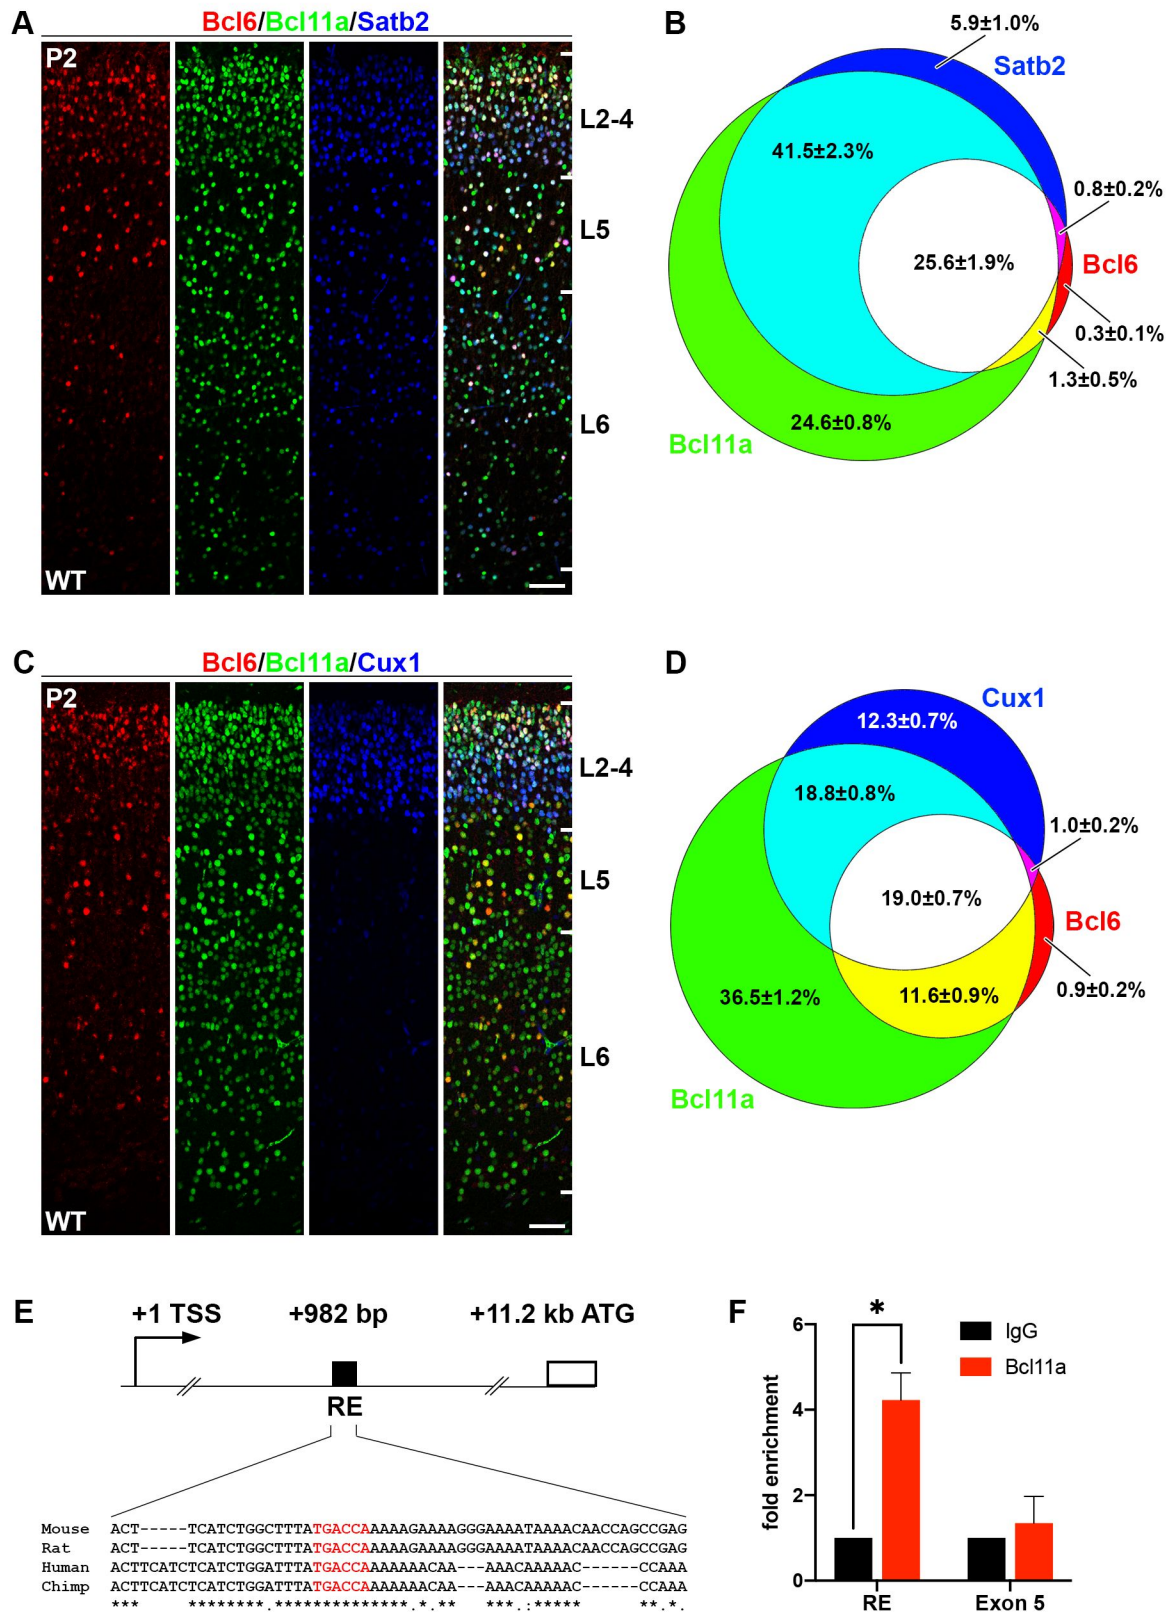

**Wiegrefe et al.**  
**Figure 3**

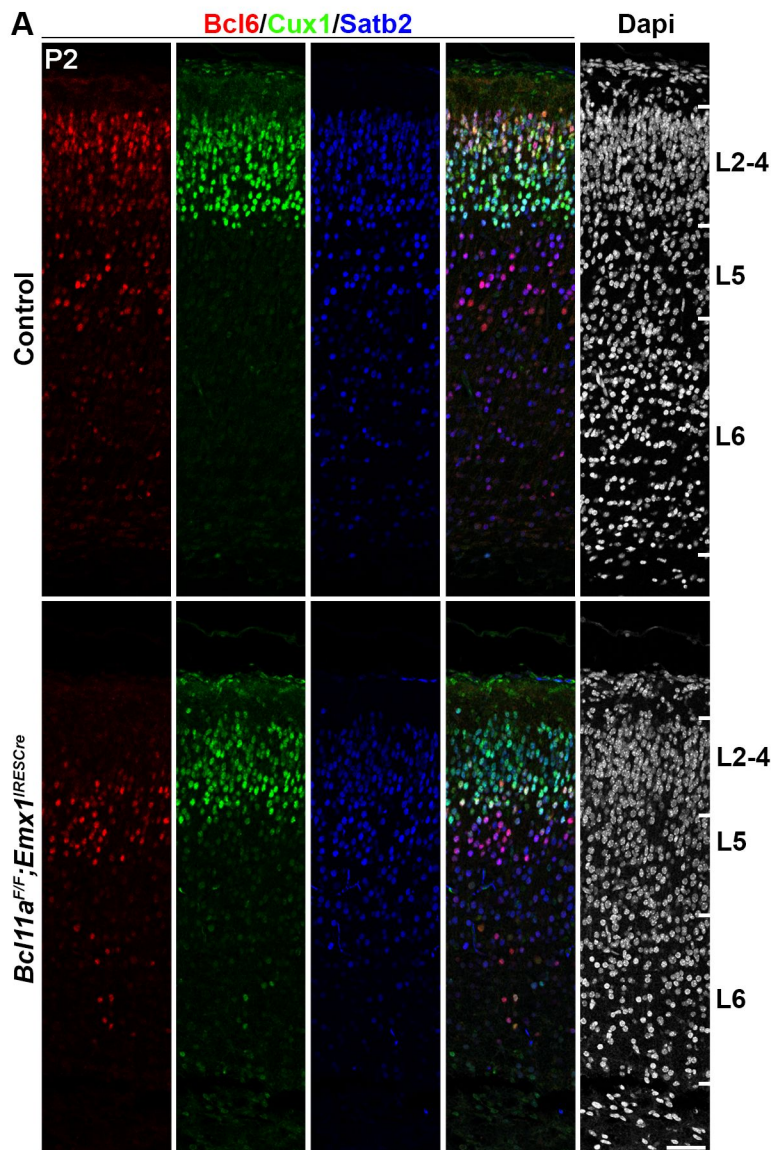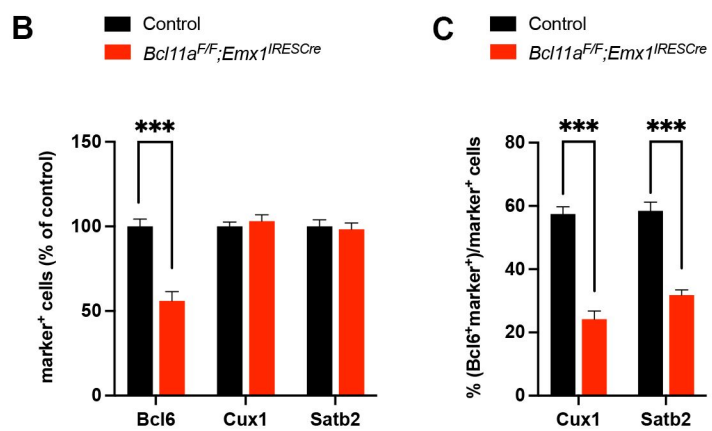



**Wiegrefe et al.**  
**Figure 4**

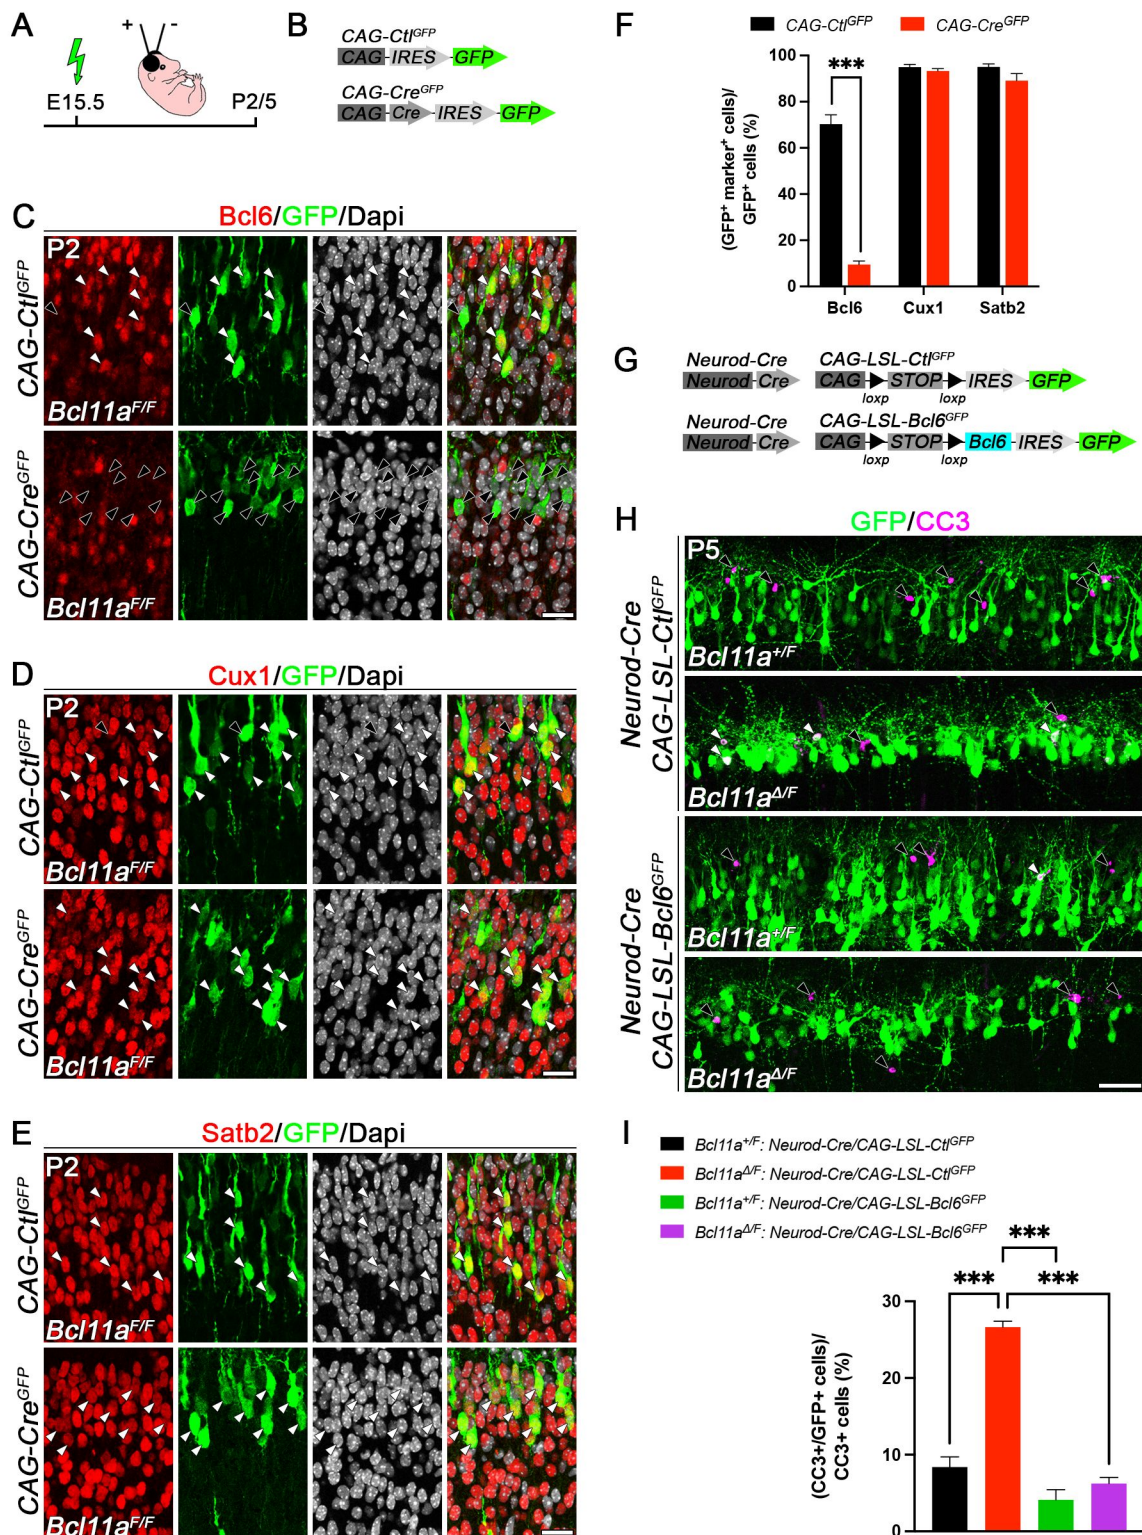



**Wiegrefe et al.**  
**Figure 5**

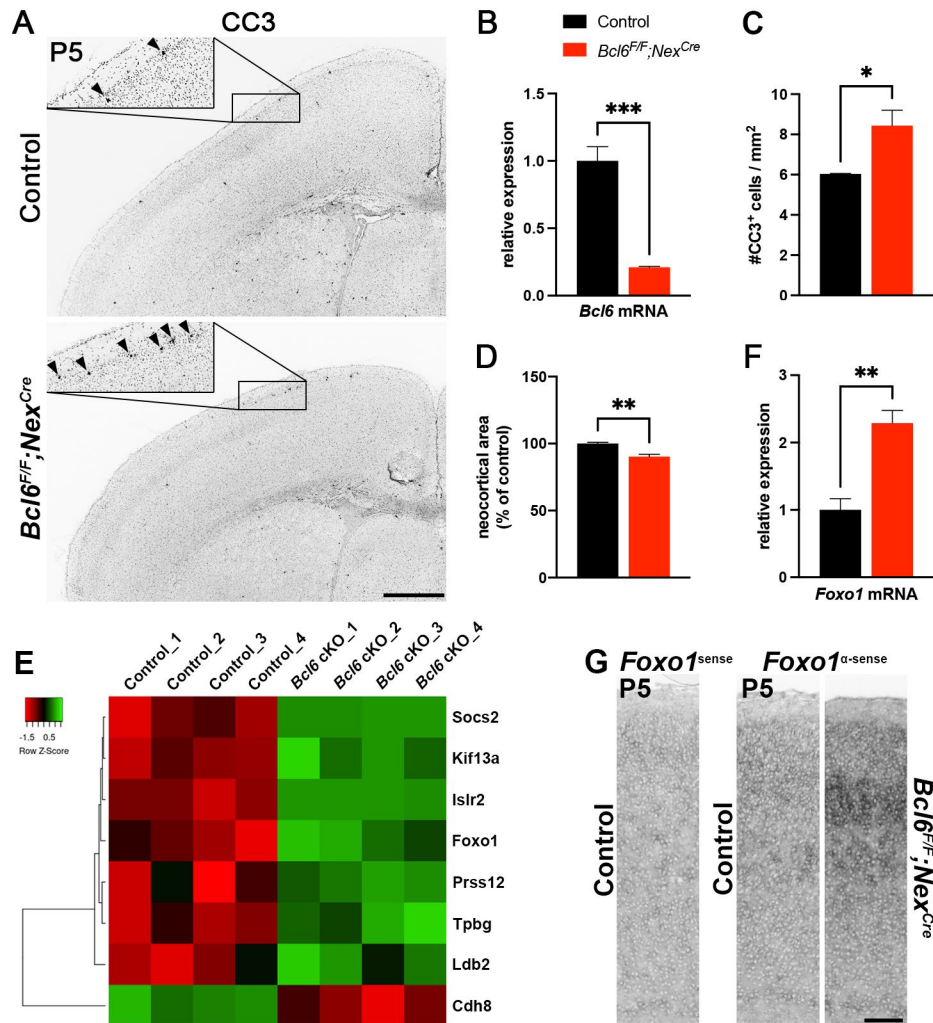

Wiegrefe et al.  
Figure S1

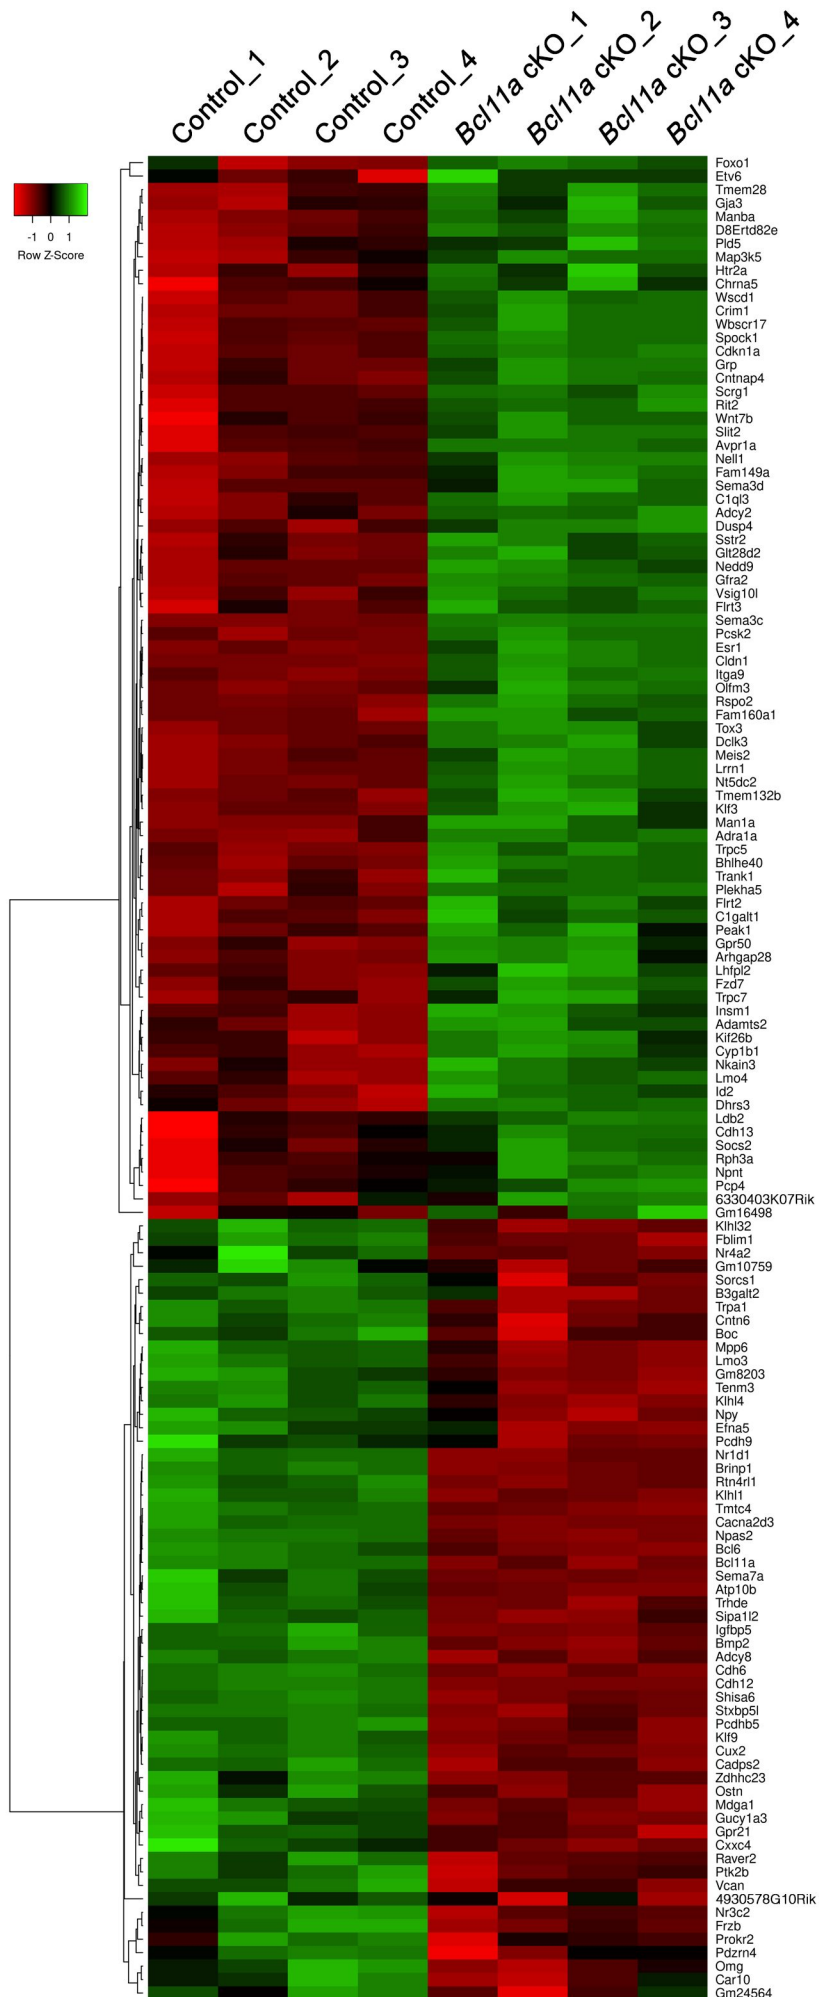

Wiegreffe et al.  
Figure S2

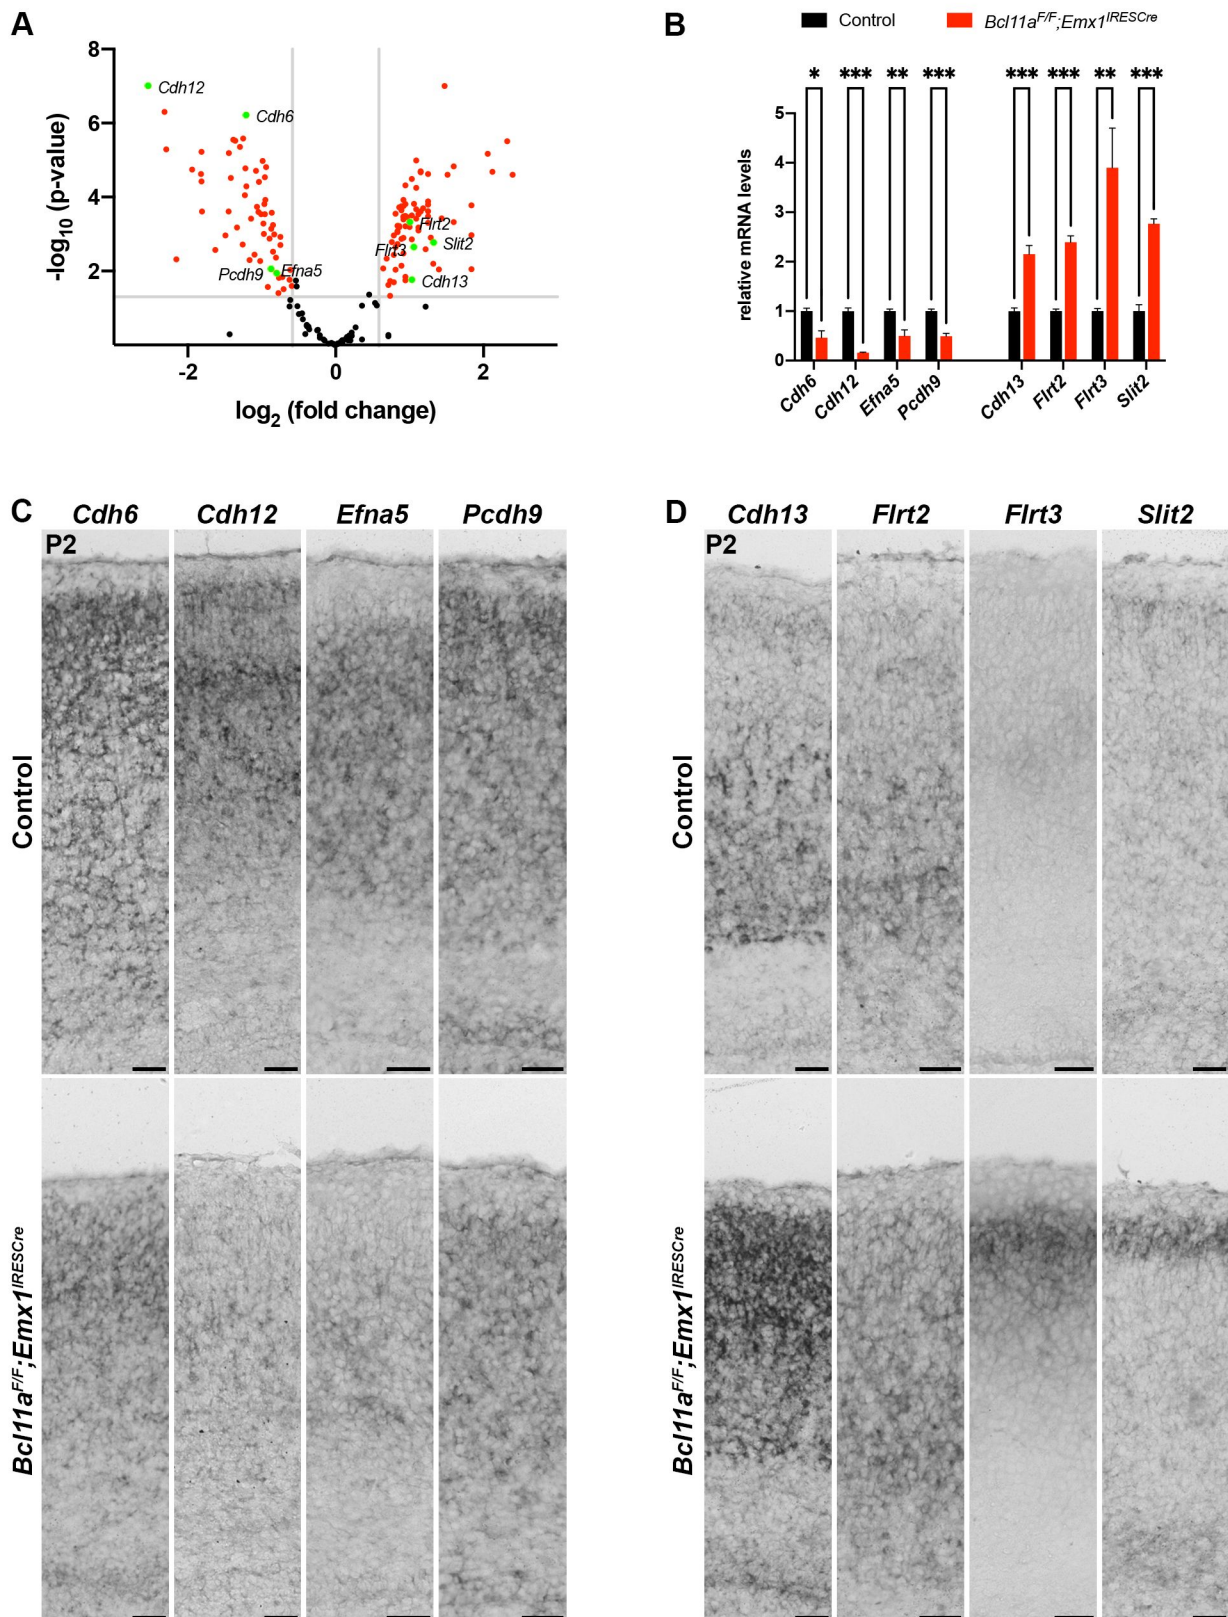

Wiegrefe et al.

Figur S3

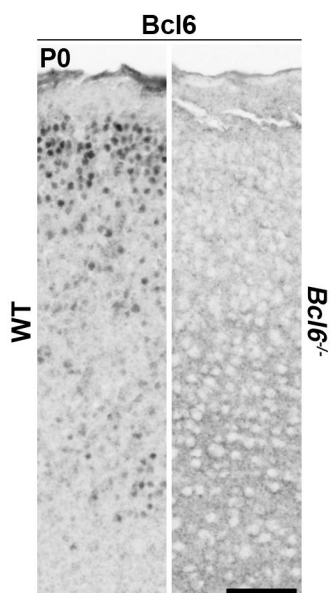



Wiegreffe et al.  
Figure S4

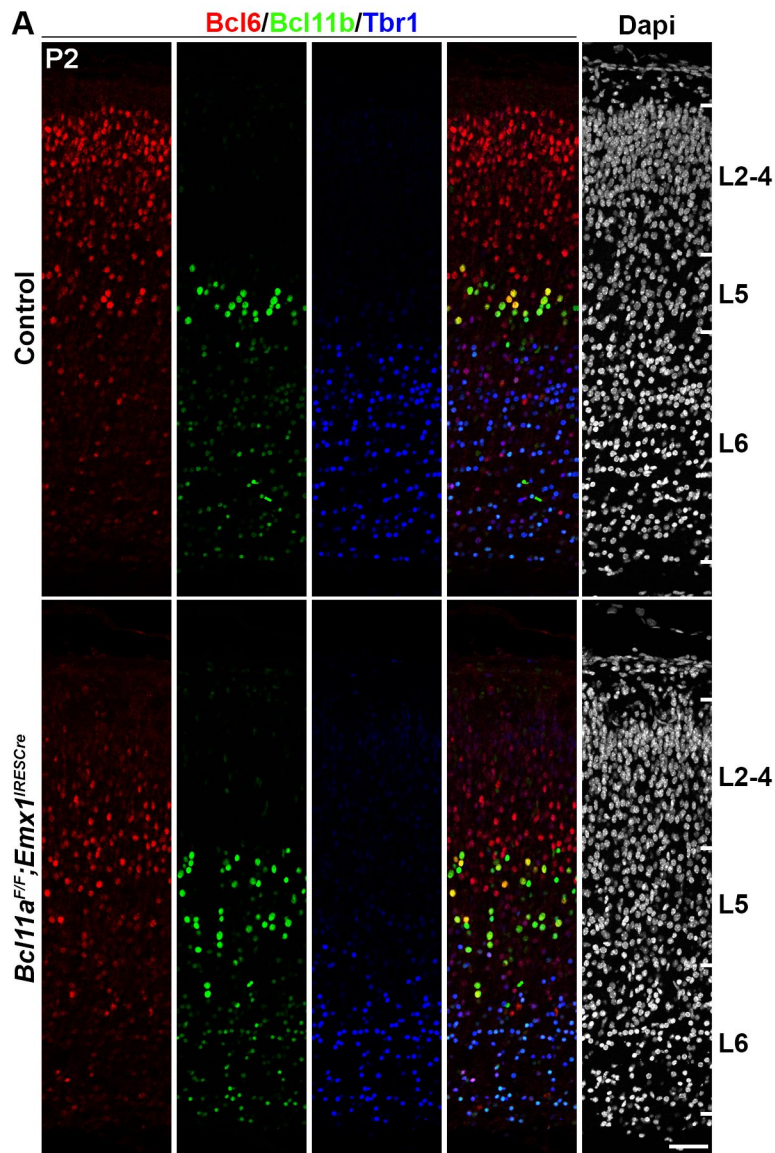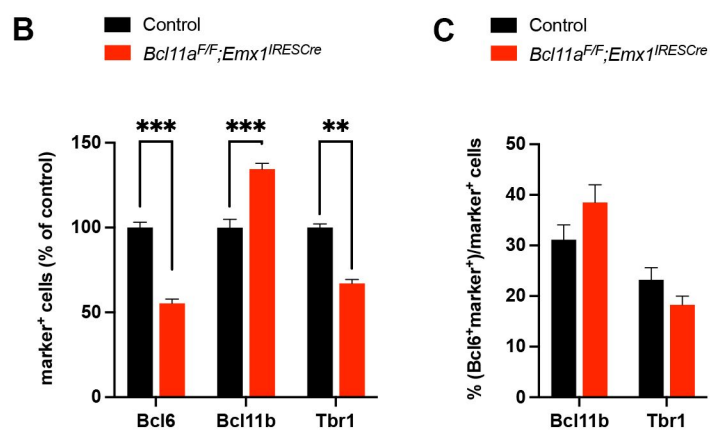

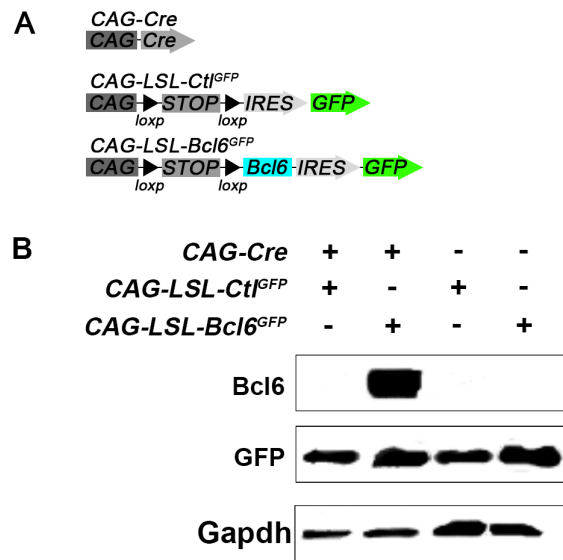

Source: https://www.biorxiv.org/content/10.1101/2021.10.06.463323v1.full.pdf
